# Supplementary material for: Doubling of the known set of RNA viruses by metagenomic analysis of an aquatic virome
Source: Springer Nature journal article supplement (doi:10.1038/s41564-020-0755-4), 2020-07-20

# Ov1

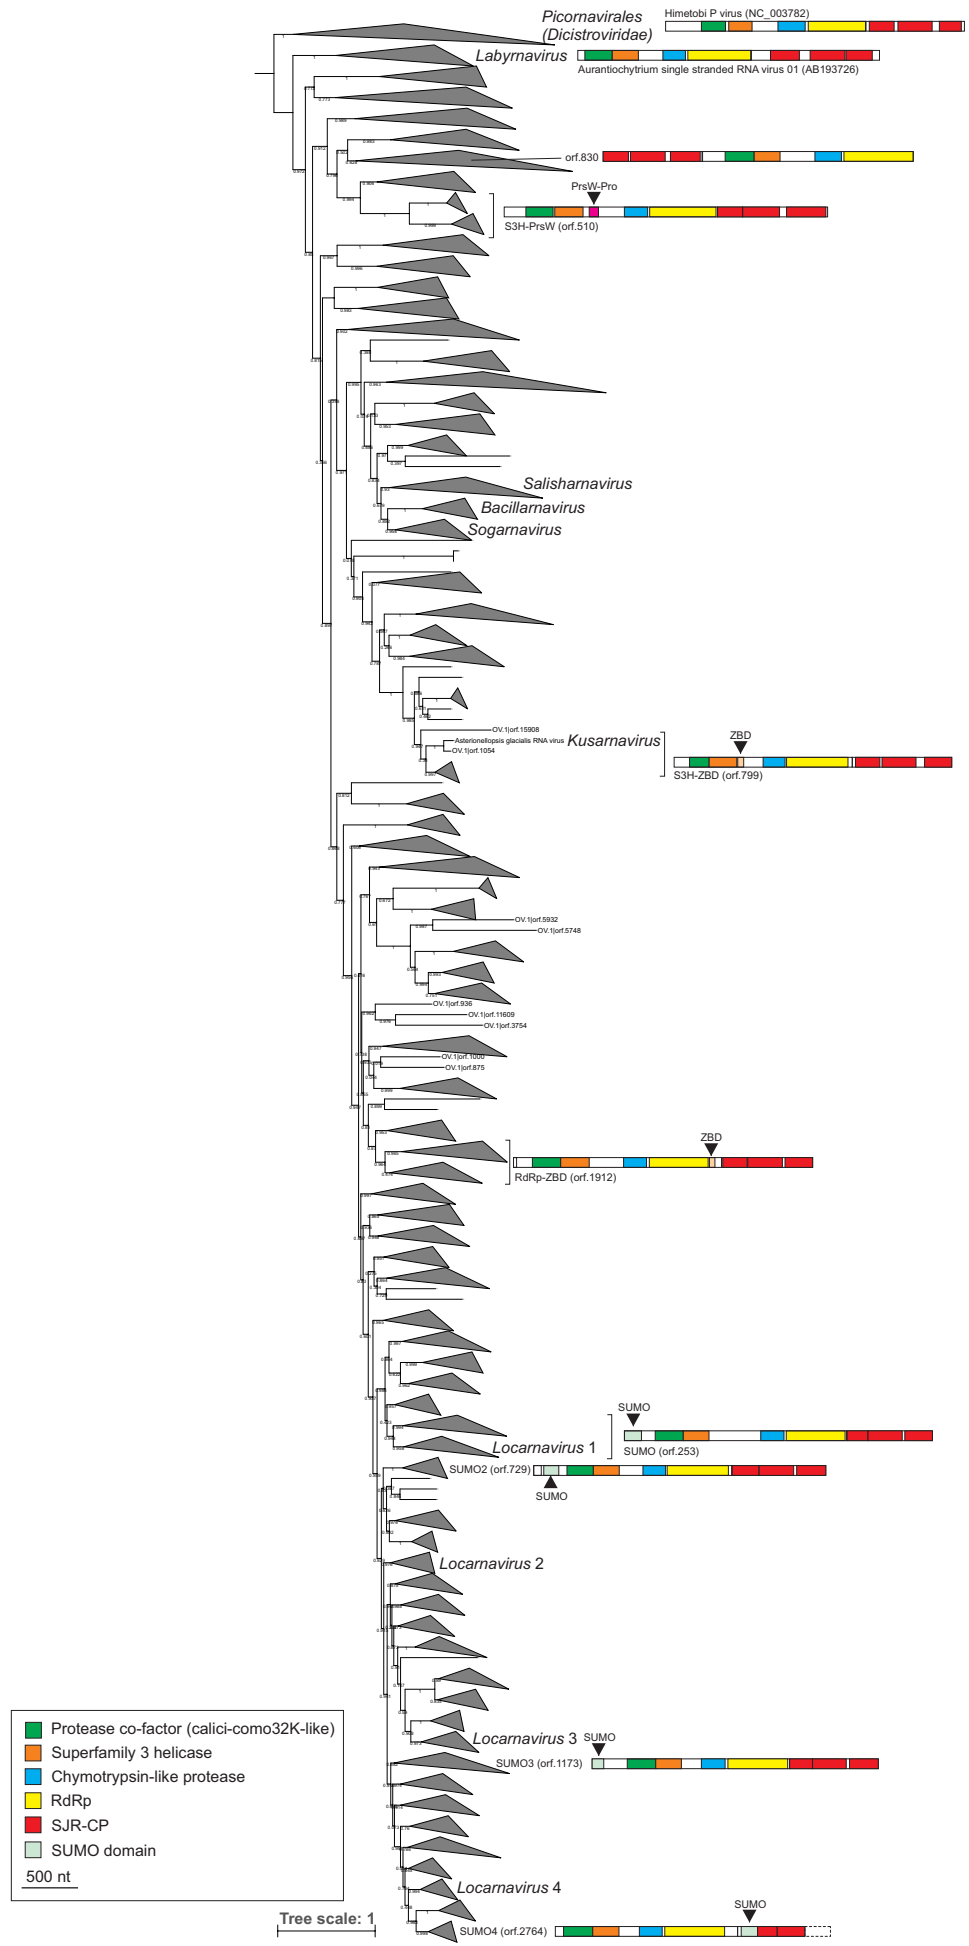

# Ov2

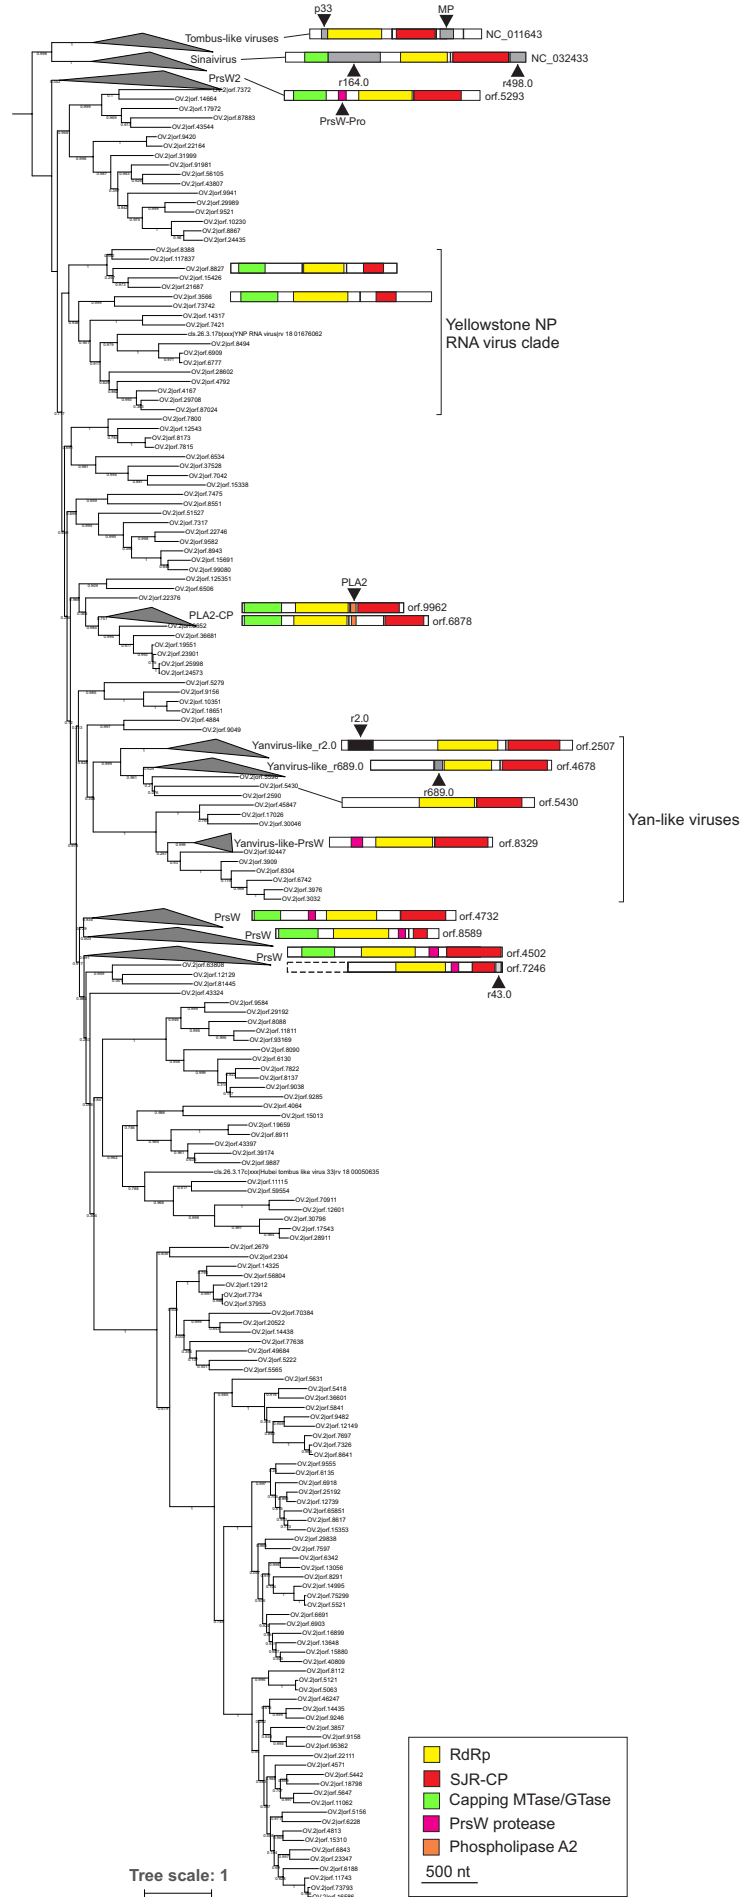

# Ov3

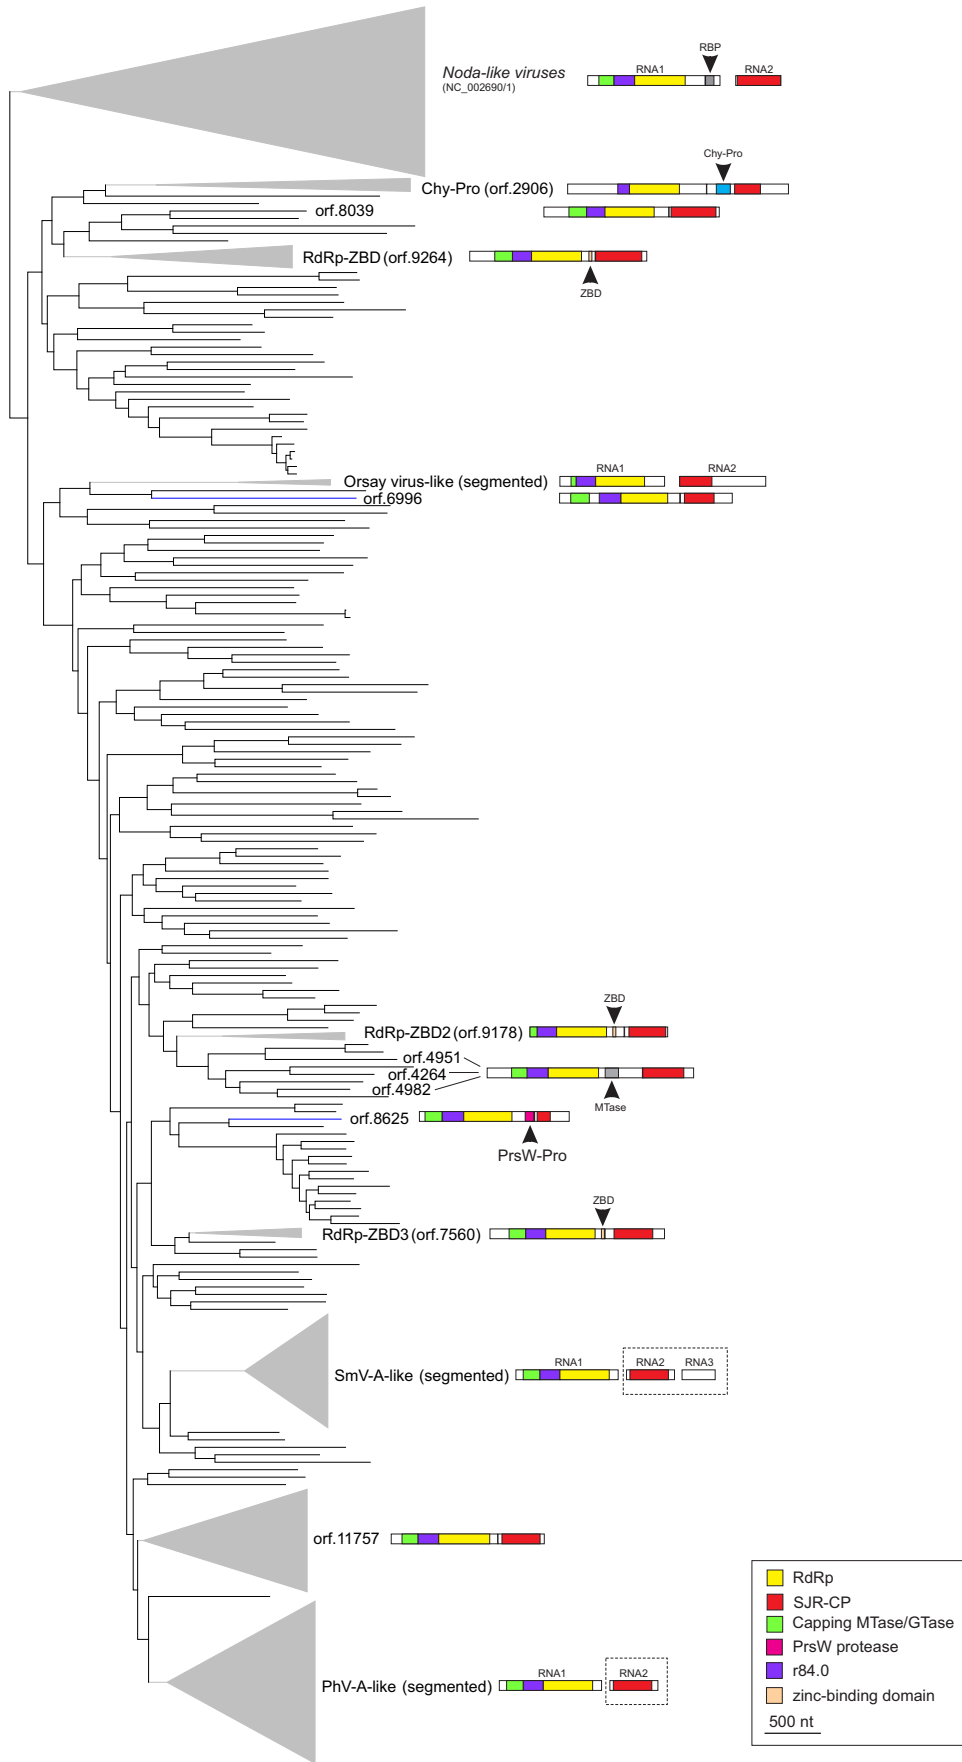



# Ov5

Tree scale: 1

## Dataset legend

- RdRp
- Capsid protein\_Jelly-roll
- Chymotrypsin-like protease
- Capping\_methyltransferase\_guanylyltransferase
- Superfamily 3 helicase
- r84.0
- Tombusvirus p33\_Luteo\_P1 domain\_auxiliary replication protein
- Superfamily 1 helicase
- Major capsid protein\_Toti-like (T=1)
- Putative protease co-factor\_calici-como32K-like
- Maturation\_Levi
- Phospholipase A2
- VP4\_Dicistro
- Capsid protein\_Levi-like
- PrsW-protease
- small\_ubiquitin-related\_modifier\_SUMO
- Zinc-binding domain
- Others

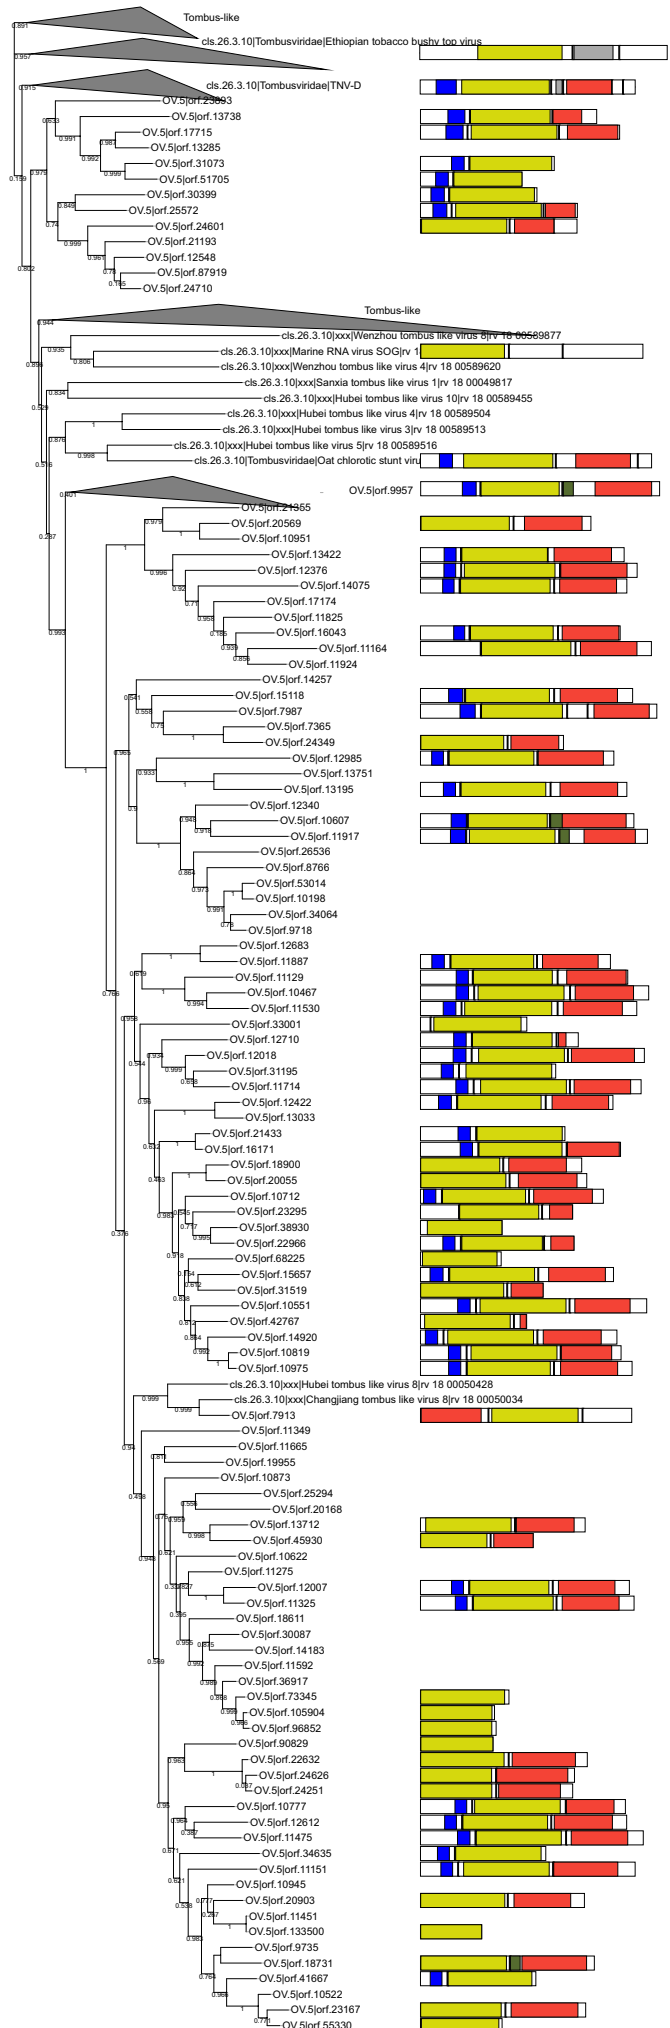

# Ov6

## Nama/bourmia-like viruses

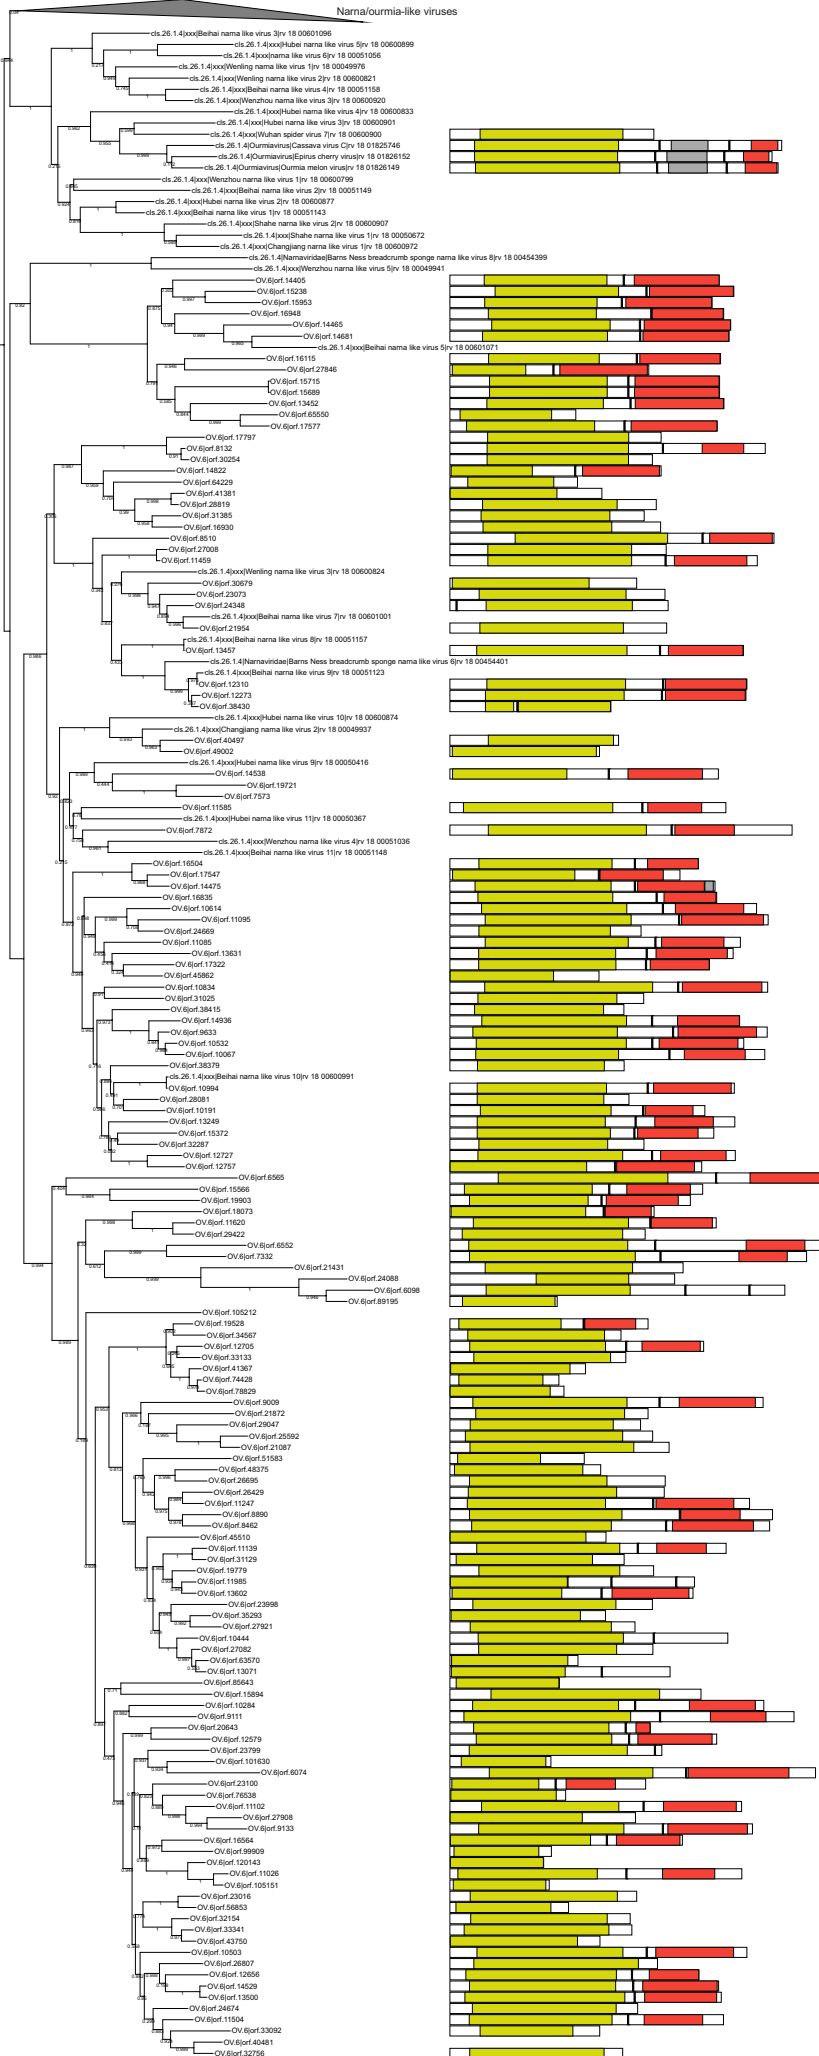

Tree scale: 1

### Dataset legend

- RdRp
- Capsid protein\_Jelly-roll
- Chymotrypsin-like protease
- Capping\_methyltransferase\_guanylyltransferase
- Superfamily 3 helicase
- r84.0
- Tombusvirus p33\_Luteo\_P1 domain\_auxiliary replication protein
- Superfamily 1 helicase
- Major capsid protein\_Toti-like (T=1)
- Putative protease co-factor\_calici-como32K-like
- Maturation\_Levi
- Phospholipase A2
- VP4\_Dicistro
- Capsid protein\_Levi-like
- PrsW-protease
- small\_ubiquitin-related\_modifier\_SUMO
- Zinc-binding domain
- Others

# Ov7

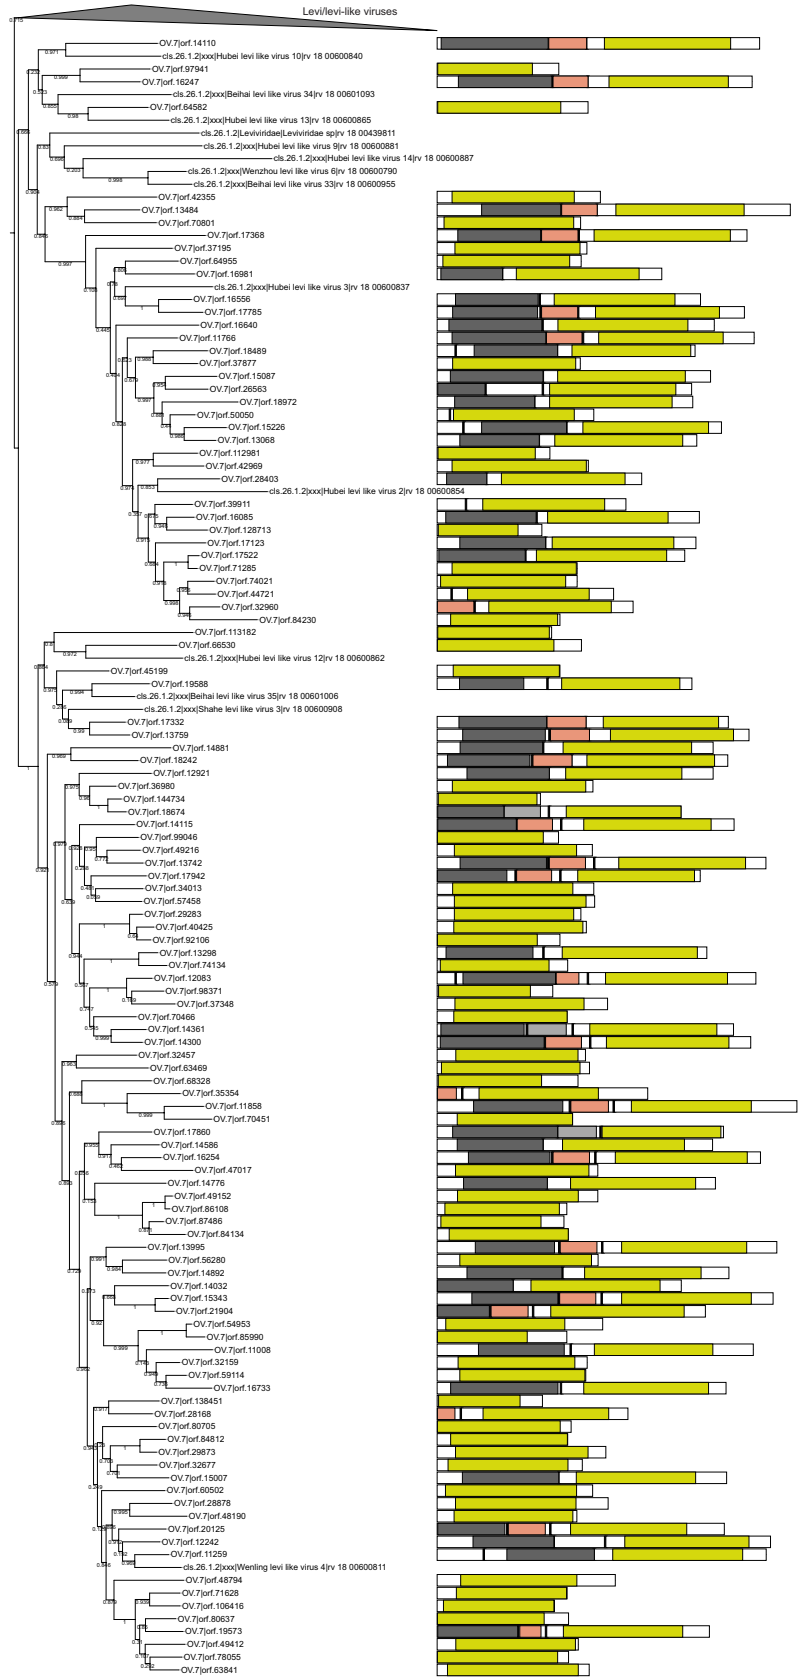

# Ov8

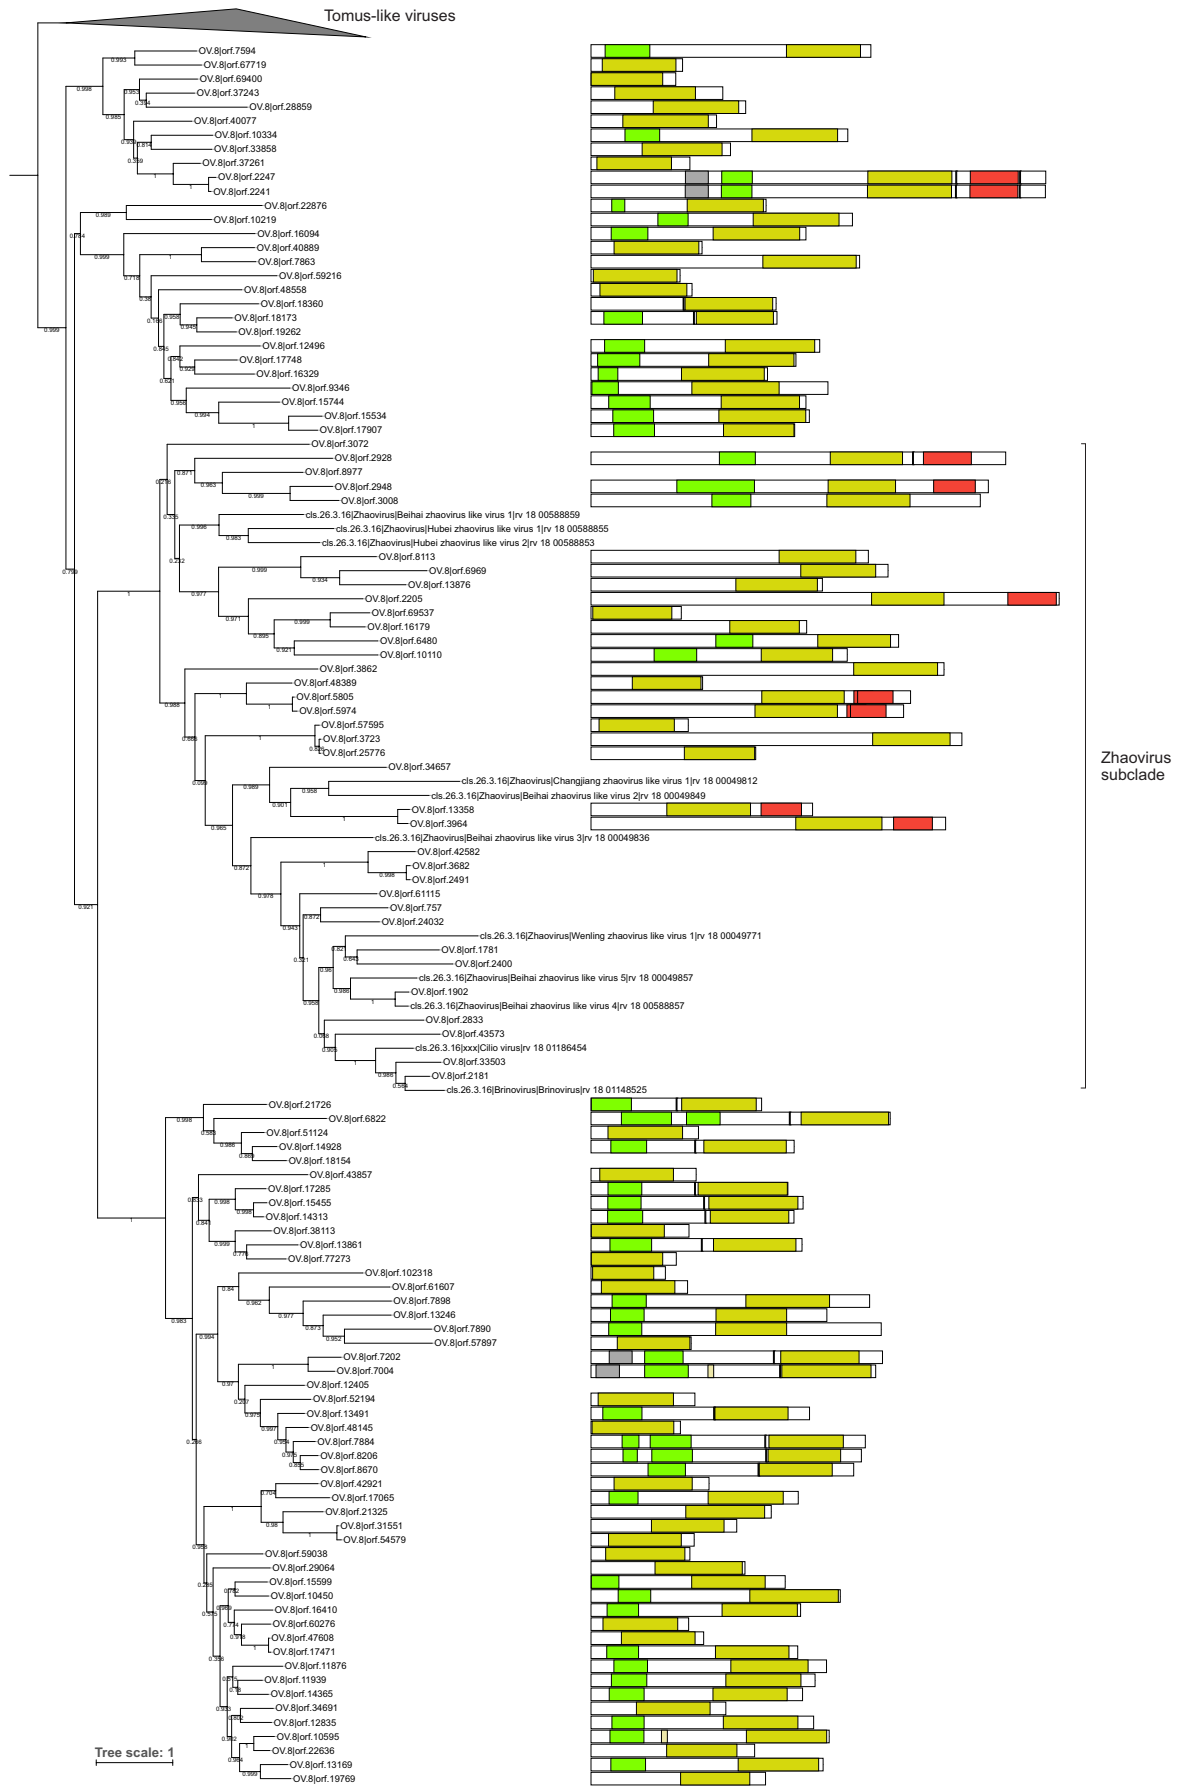



# Ov9

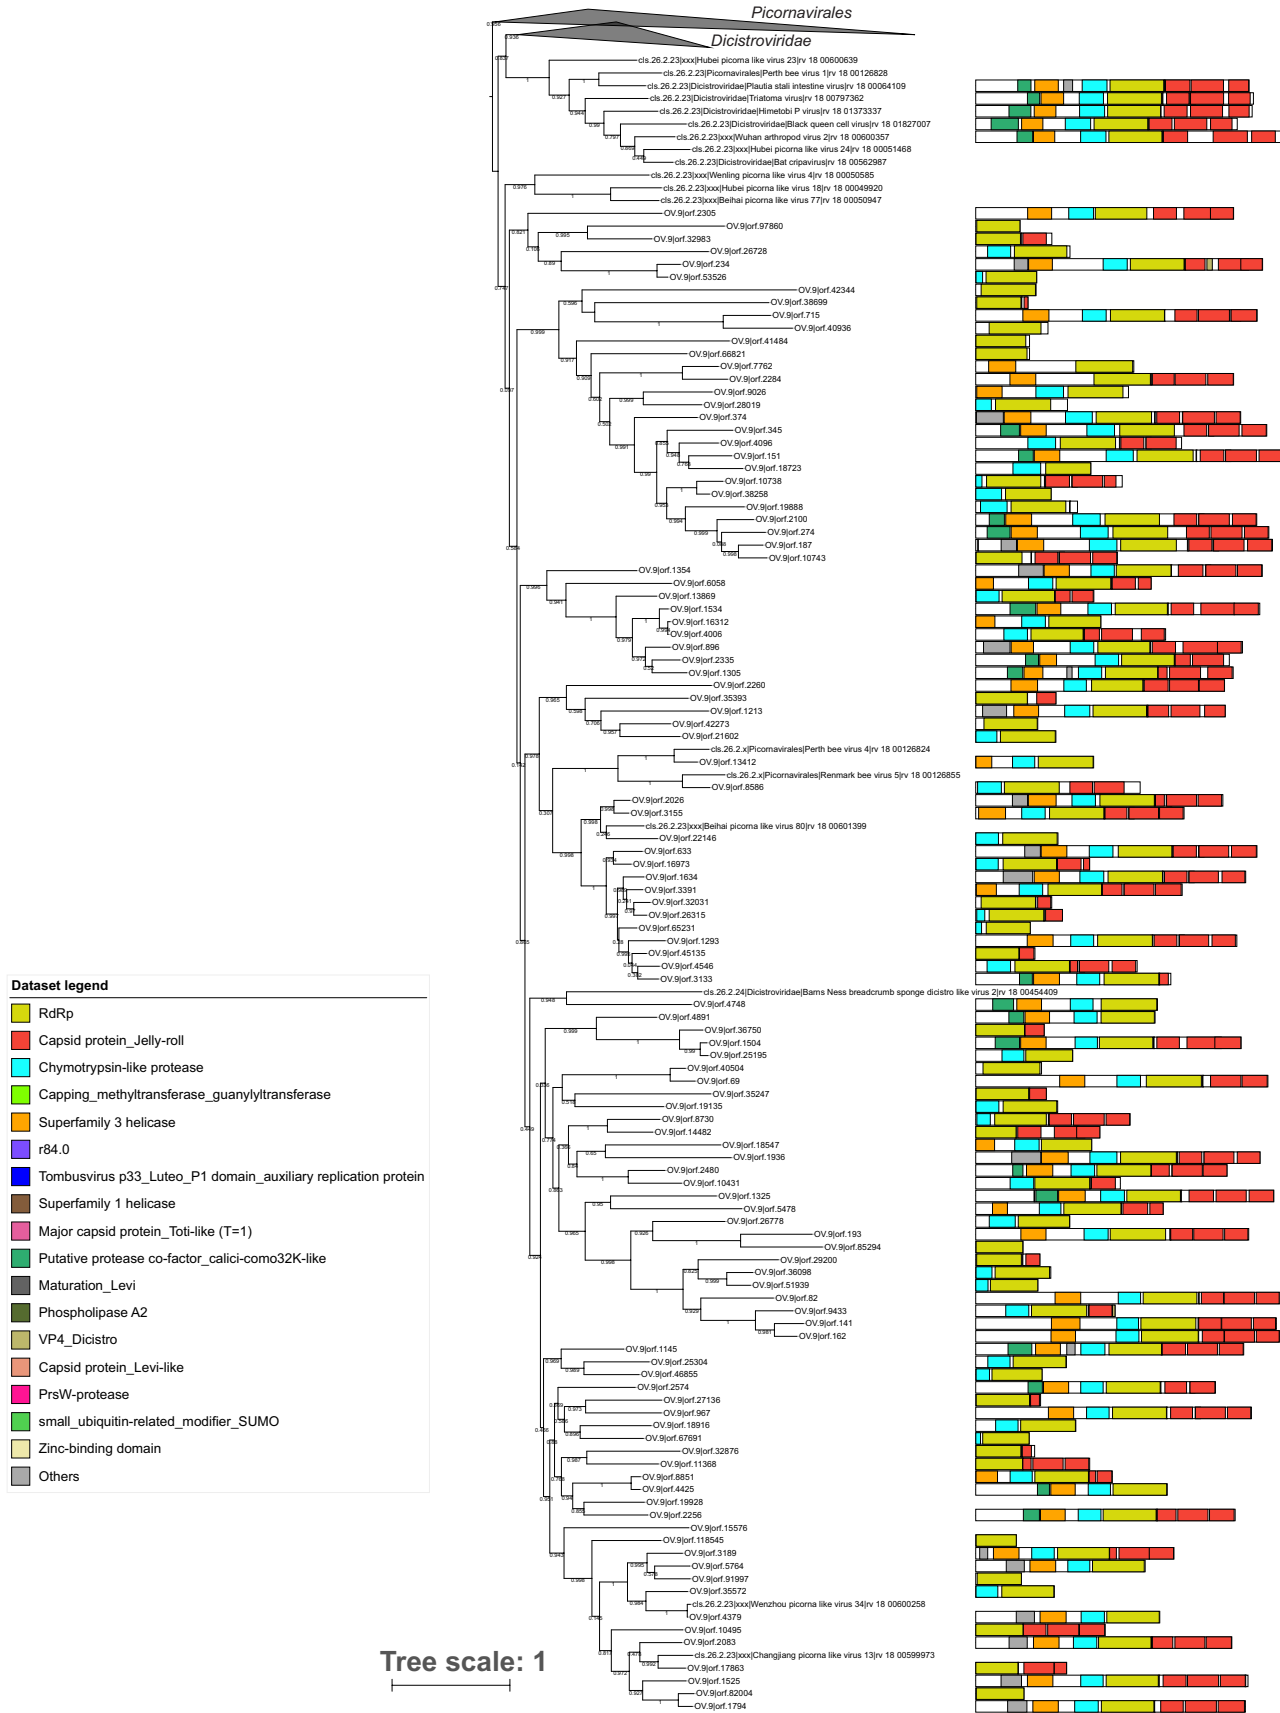

# Ov10

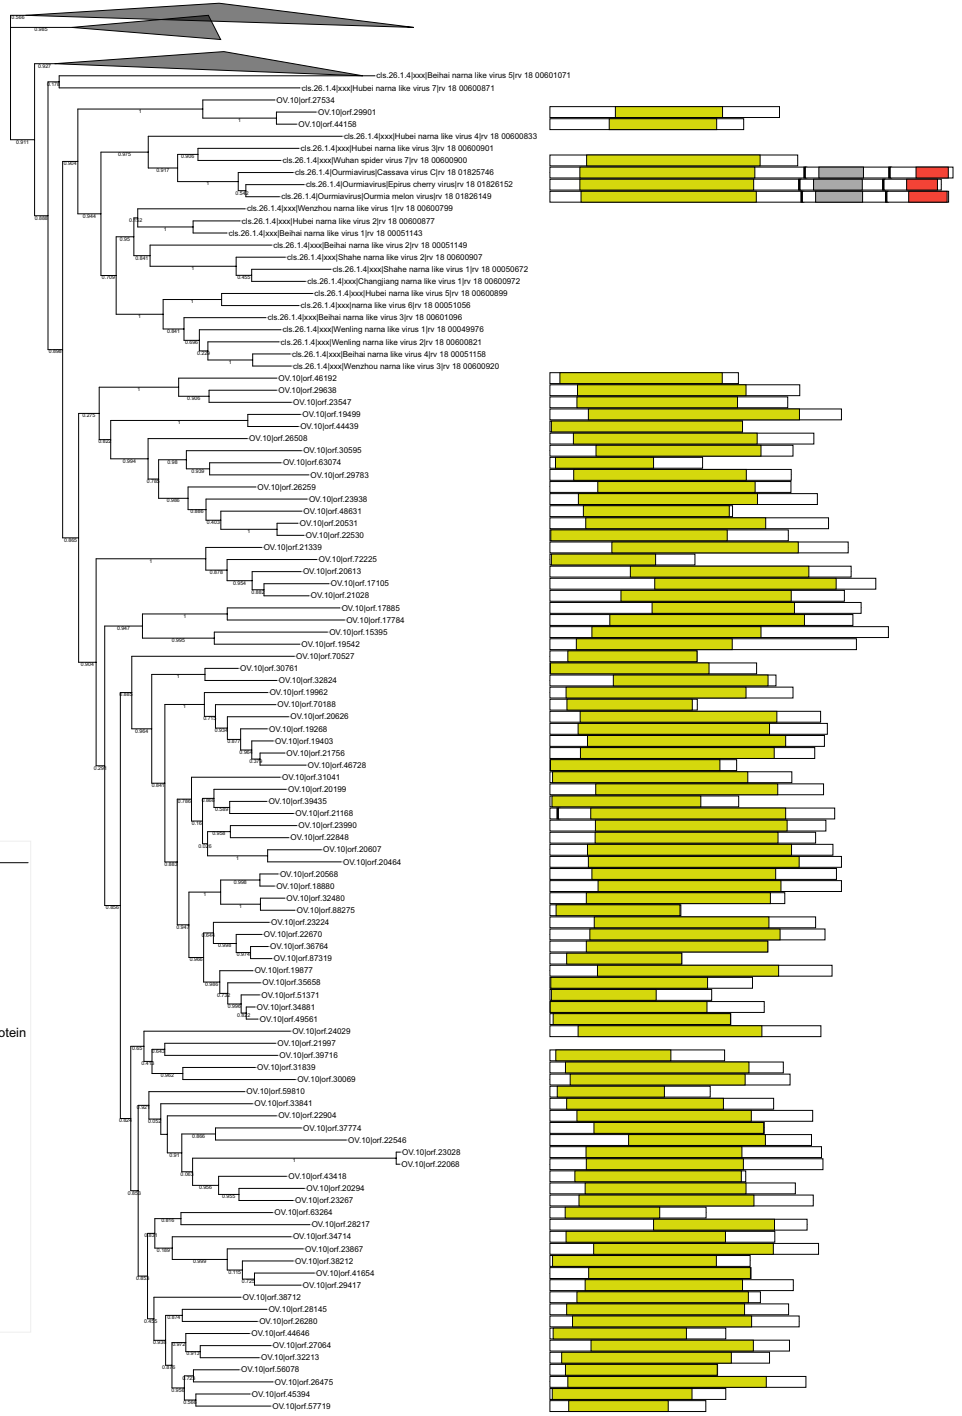

### Dataset legend

- RdRp
- Capsid protein\_Jelly-roll
- Chymotrypsin-like protease
- Capping\_methyltransferase\_guanylyltransferase
- Superfamily 3 helicase
- r84.0
- Tombusvirus p33\_Luteo\_P1 domain\_auxiliary replication protein
- Superfamily 1 helicase
- Major capsid protein\_Toti-like (T=1)
- Putative protease co-factor\_calici-corno32K-like
- Maturation\_Levi
- Phospholipase A2
- VP4\_Dicistro
- Capsid protein\_Levi-like
- PrsW-protease
- small\_ubiquitin-related\_modifier\_SUMO
- Zinc-binding domain
- Others

Tree scale: 1

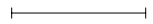

# Ov11

## Dataset legend

- RdRp
- Capsid protein\_Jelly-roll
- Chymotrypsin-like protease
- Capping\_methyltransferase\_guanylyltransferase
- Superfamily 3 helicase
- r84.0
- Tombusvirus p33\_Luteo\_P1 domain\_auxiliary replication protein
- Superfamily 1 helicase
- Major capsid protein\_Toti-like (T=1)
- Putative protease co-factor\_calici-como32K-like
- Phospholipase A2
- Zinc-binding domain
- Others

Tree scale: 1

Tree scale: 1

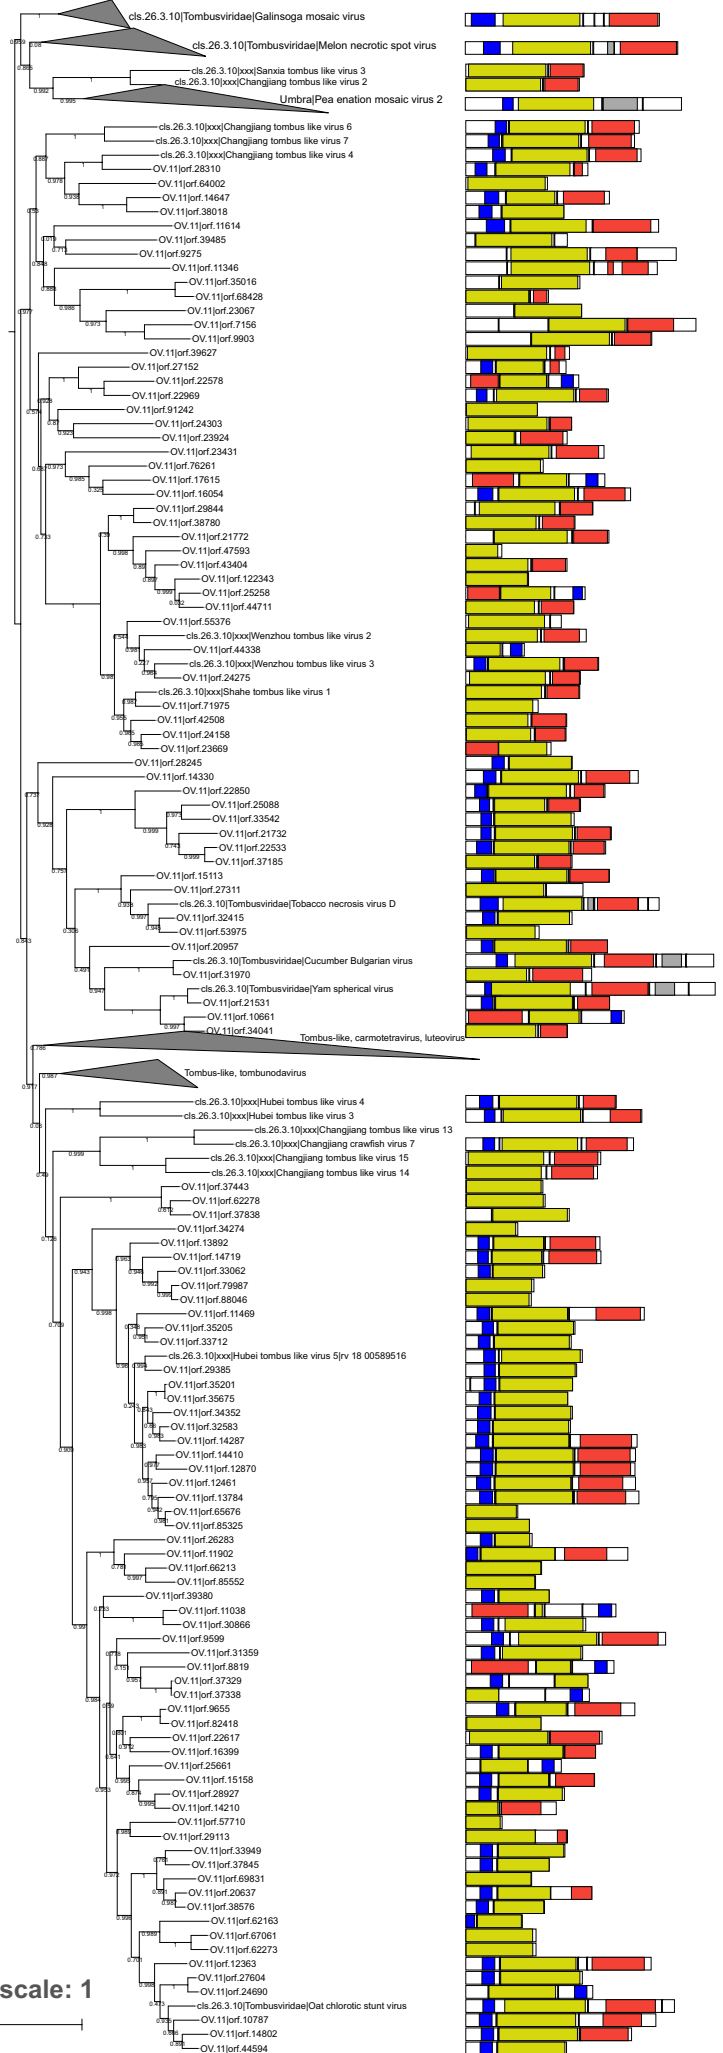

# Ov12

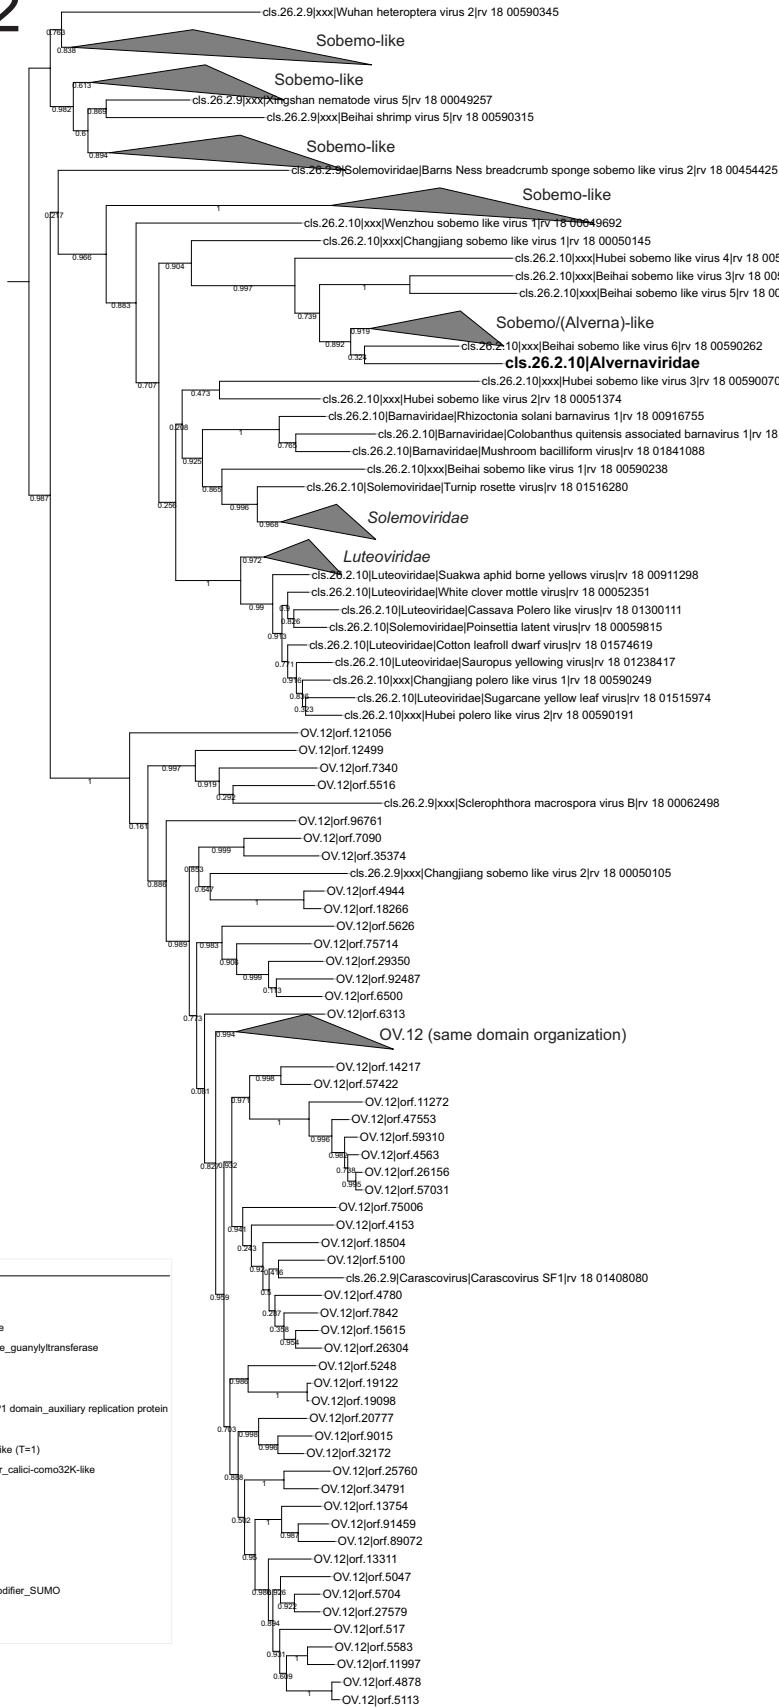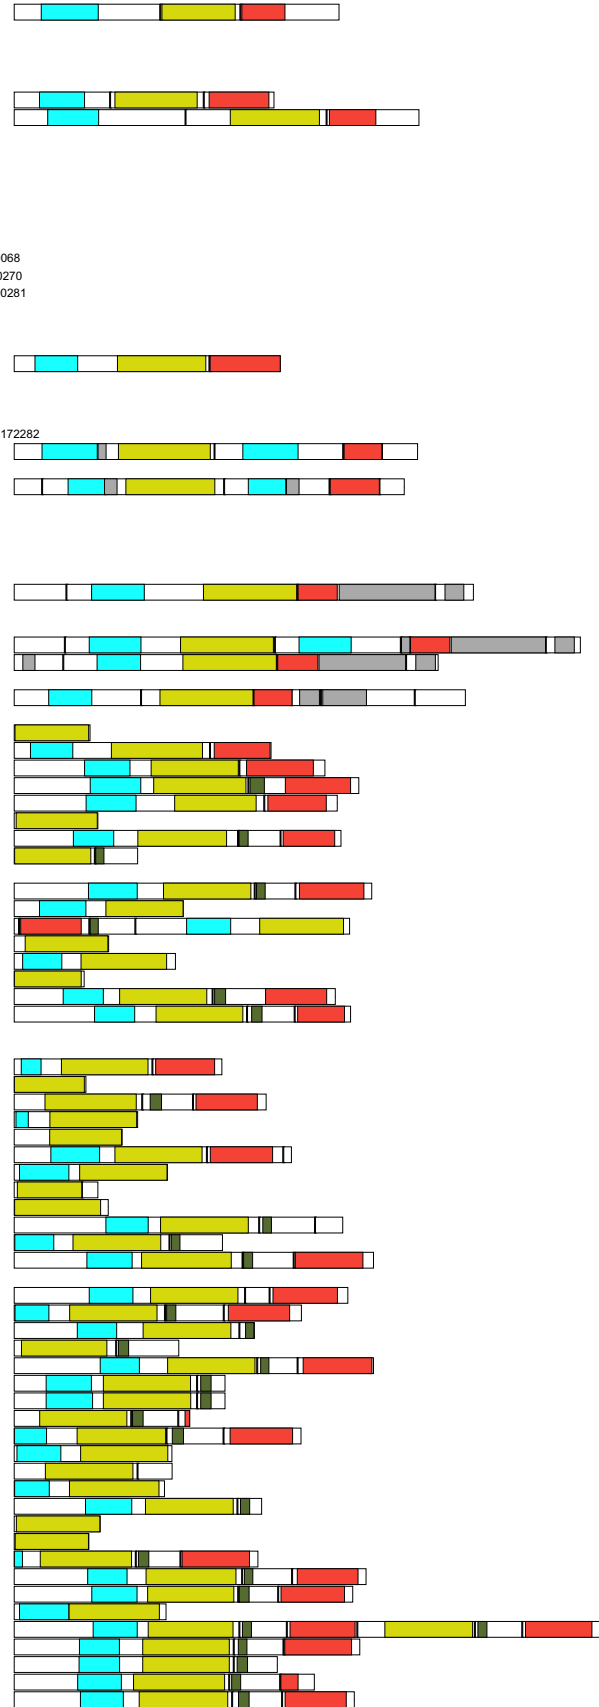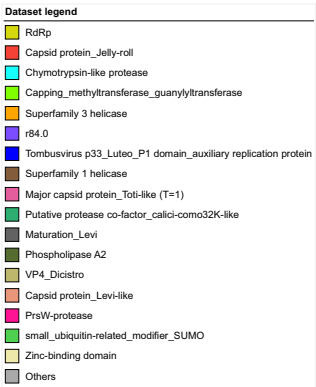

Tree scale: 1

# Ov13

## Dataset legend

- RdRp
- Capsid protein\_Jelly-roll
- Chymotrypsin-like protease
- Superfamily 3 helicase
- r84.0
- Superfamily 1 helicase
- Major capsid protein\_Toti-like (T=1)
- Protease co-factor\_calici-como32K-like
- Maturation\_Levi
- Phospholipase A2
- VP4\_Dicistro
- Capsid protein\_Levi-like
- PrsW-protease
- Zinc-binding domain
- Others

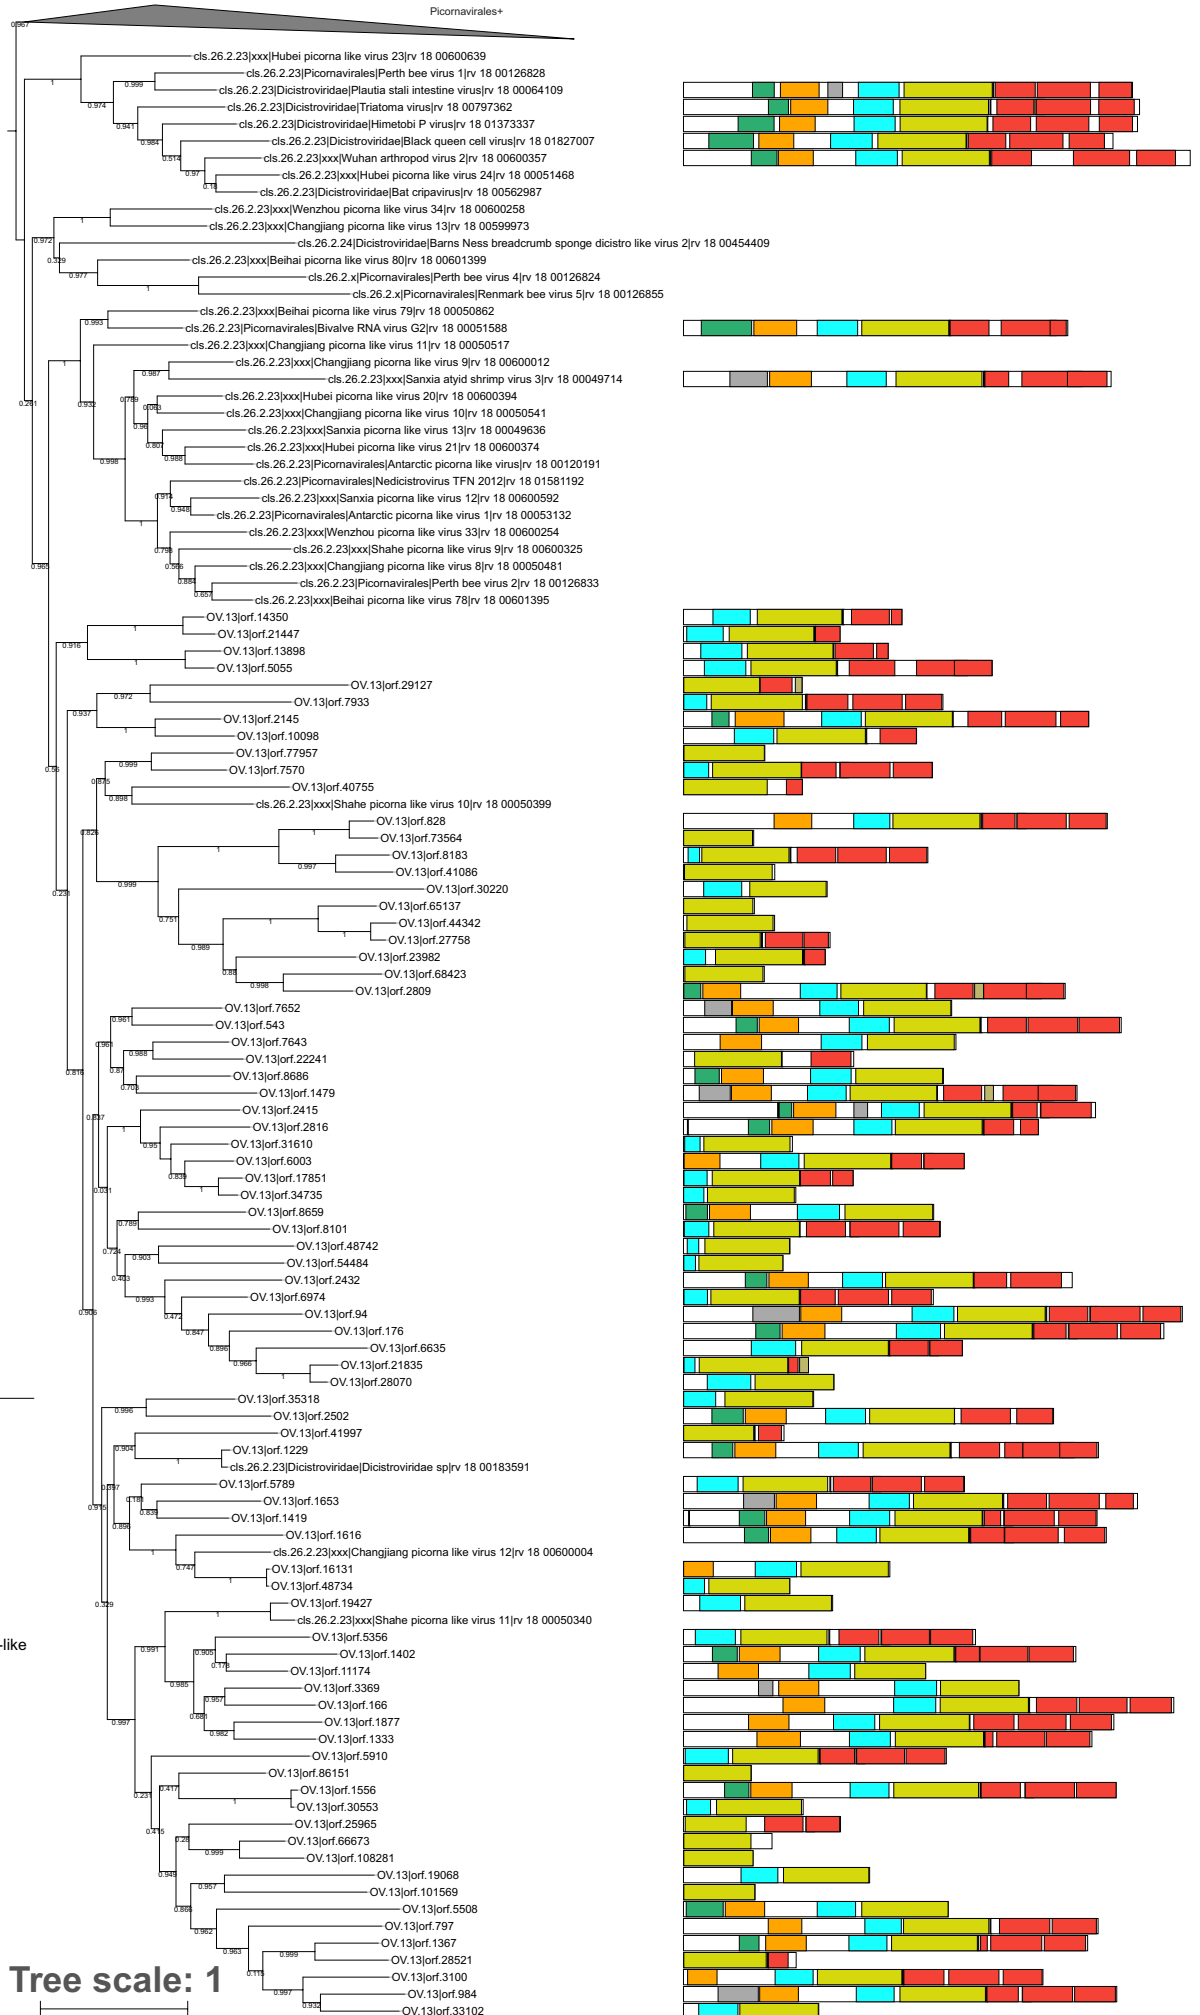

# Ov16

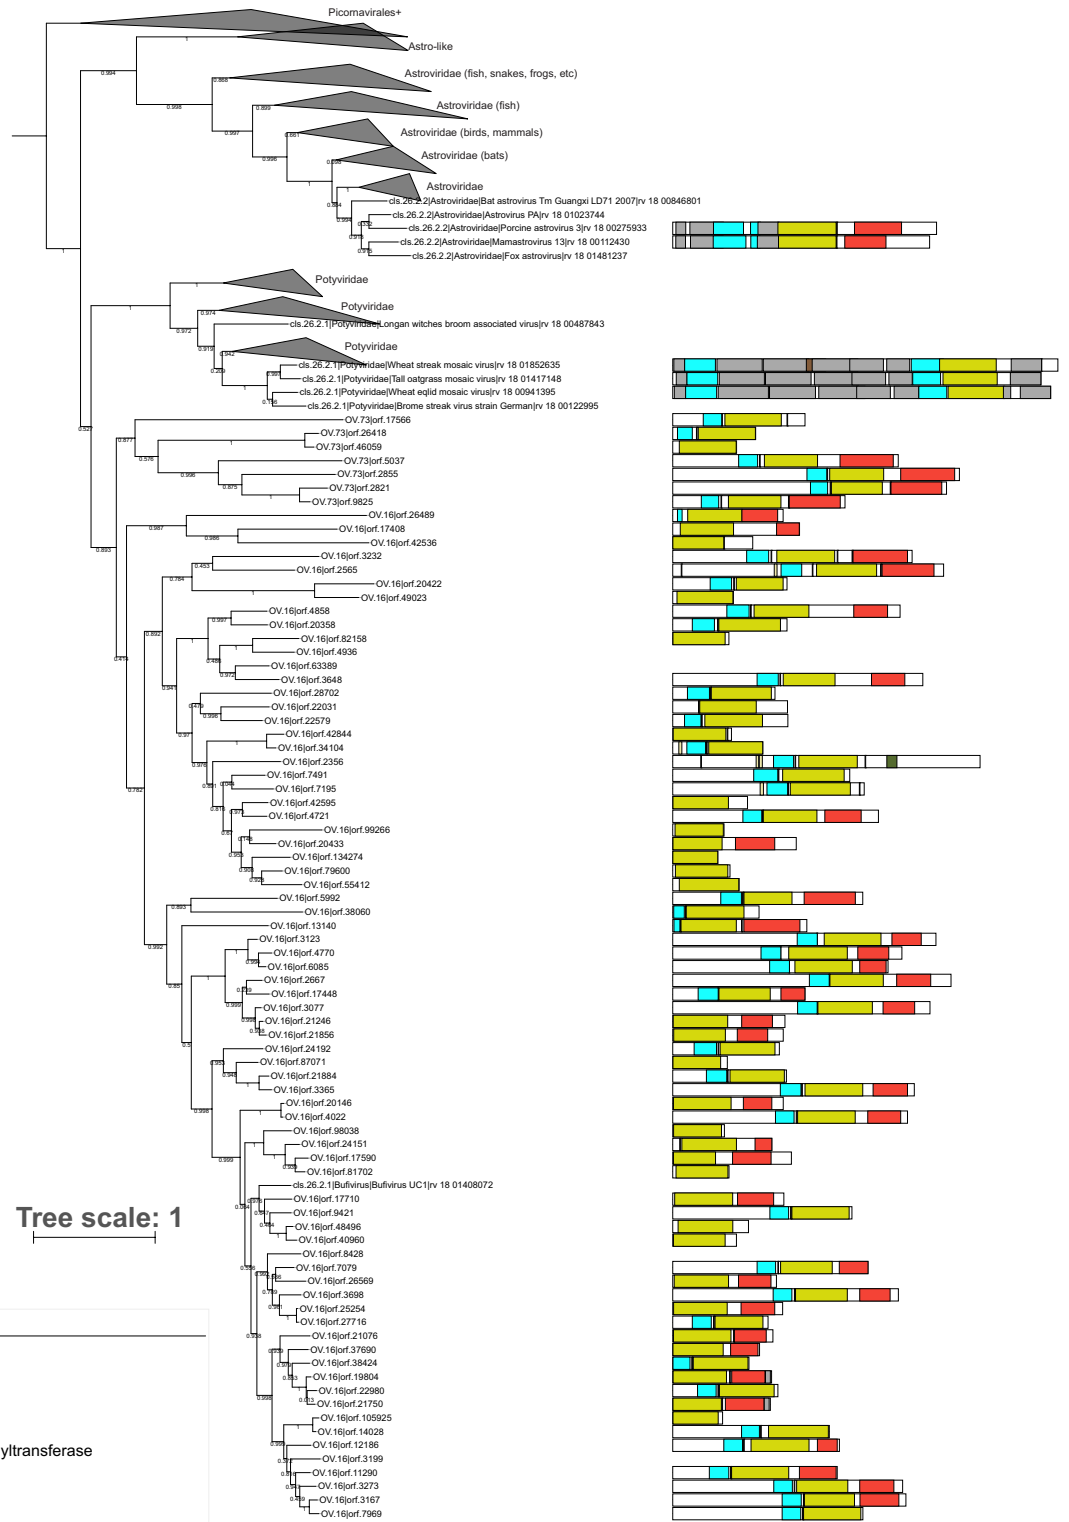

- Dataset legend**
- RdRp
  - Capsid protein\_Jelly-roll
  - Chymotrypsin-like protease
  - Capping\_methyltransferase\_guanylyltransferase
  - Superfamily 3 helicase
  - r84.0
  - Tombusvirus p33\_Luteo\_P1 domain\_auxiliary replication protein
  - Superfamily 1 helicase
  - Major capsid protein\_Toti-like (T=1)
  - Putative protease co\_factor\_calici-como32K-like
  - Maturation\_Levi
  - Phospholipase A2
  - VP4\_Dicistro
  - Capsid protein\_Levi-like
  - PrsW-protease
  - small\_ubiquitin-related\_modifier\_SUMO
  - Zinc-binding domain
  - Others

# Ov23

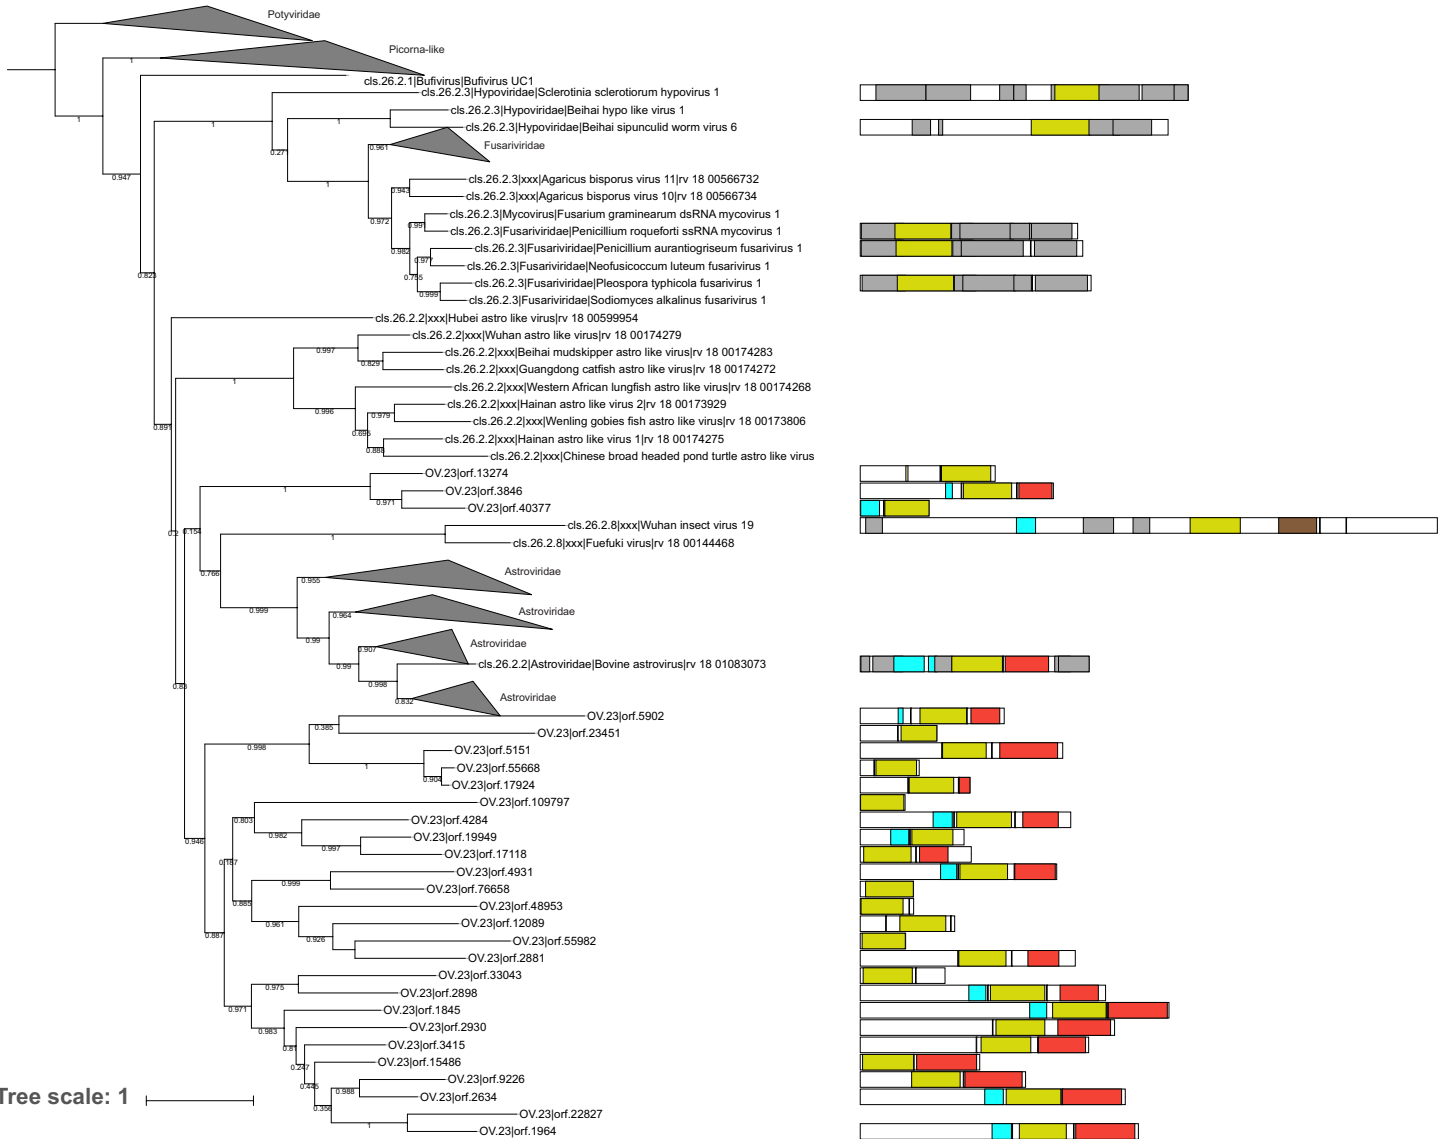

## Dataset legend

- RdRp
- Capsid protein\_Jelly-roll
- Chymotrypsin-like protease
- Capping\_methyltransferase\_guanylyltransferase
- Superfamily 3 helicase
- r84.0
- Tombusvirus p33\_Luteo\_P1 domain\_auxiliary replication protein
- Superfamily 1 helicase
- Major capsid protein\_Toti-like (T=1)
- Putative protease co-factor\_calici-como32K-like
- Maturation\_Levi
- Phospholipase A2
- VP4\_Dicistro
- Capsid protein\_Levi-like
- PrsW-protease
- small\_ubiquitin-related\_modifier\_SUMO
- Zinc-binding domain
- Others

# Ov29

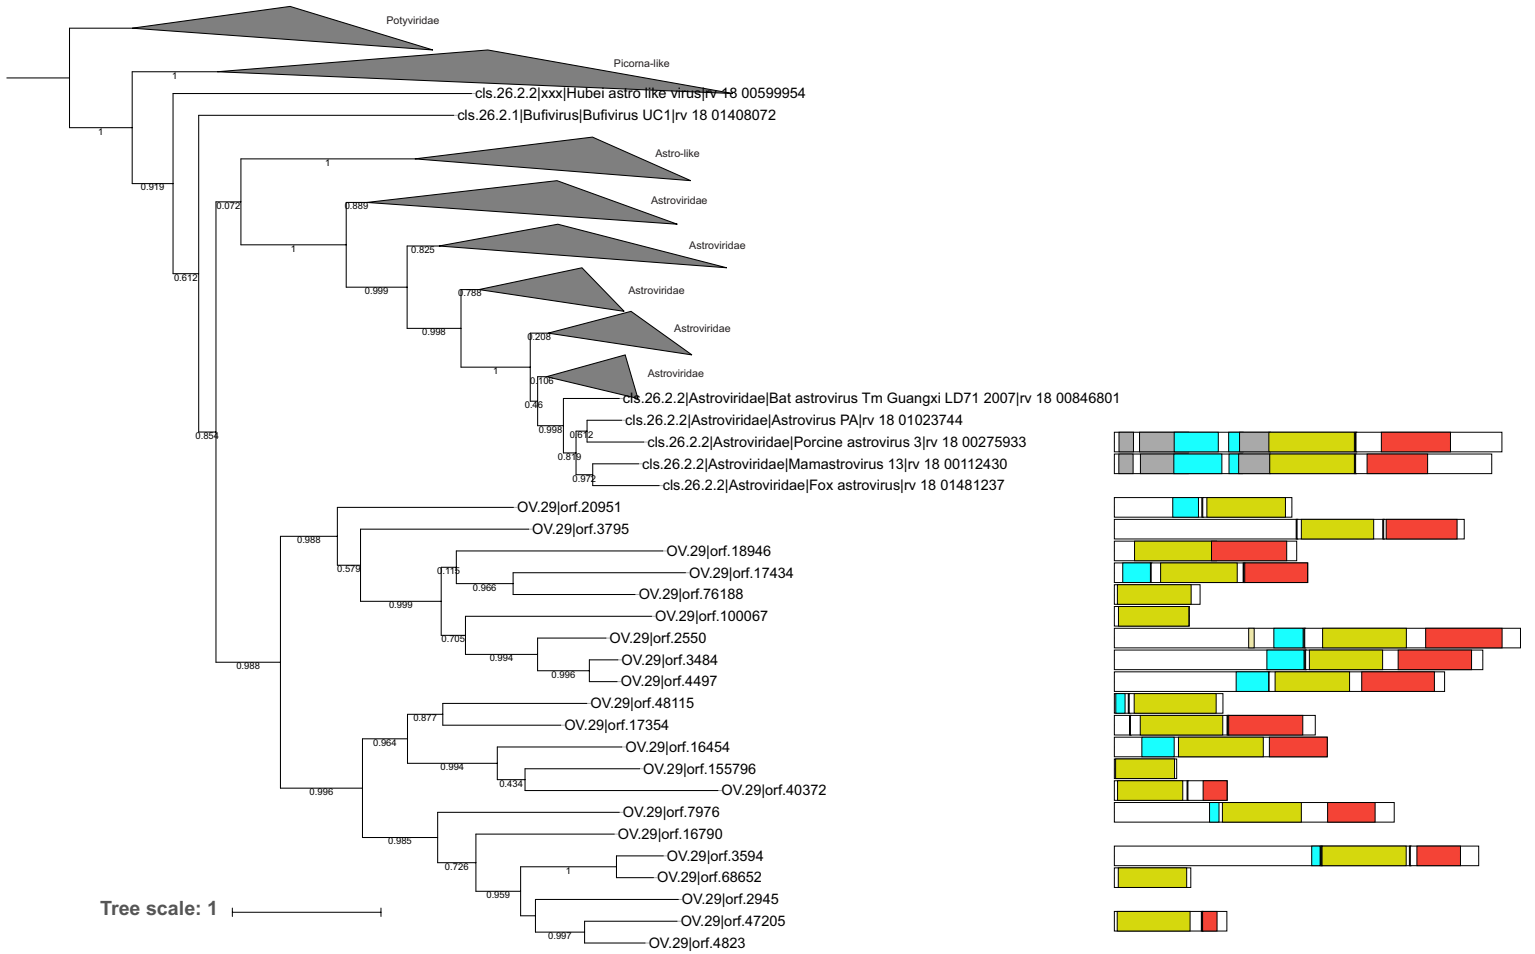

## Dataset legend

- RdRp
- Capsid protein\_Jelly-roll
- Chymotrypsin-like protease
- Capping\_methyltransferase\_guanylyltransferase
- Superfamily 3 helicase
- r84.0
- Tombusvirus p33\_Luteo\_P1 domain\_auxiliary replication protein
- Superfamily 1 helicase
- Major capsid protein\_Toti-like (T=1)
- Putative protease co-factor\_calici-como32K-like
- Maturation\_Levi
- Phospholipase A2
- VP4\_Dicistro
- Capsid protein\_Levi-like
- PrsW-protease
- small\_ubiquitin-related\_modifier\_SUMO
- Zinc-binding domain
- Others



# Ov34

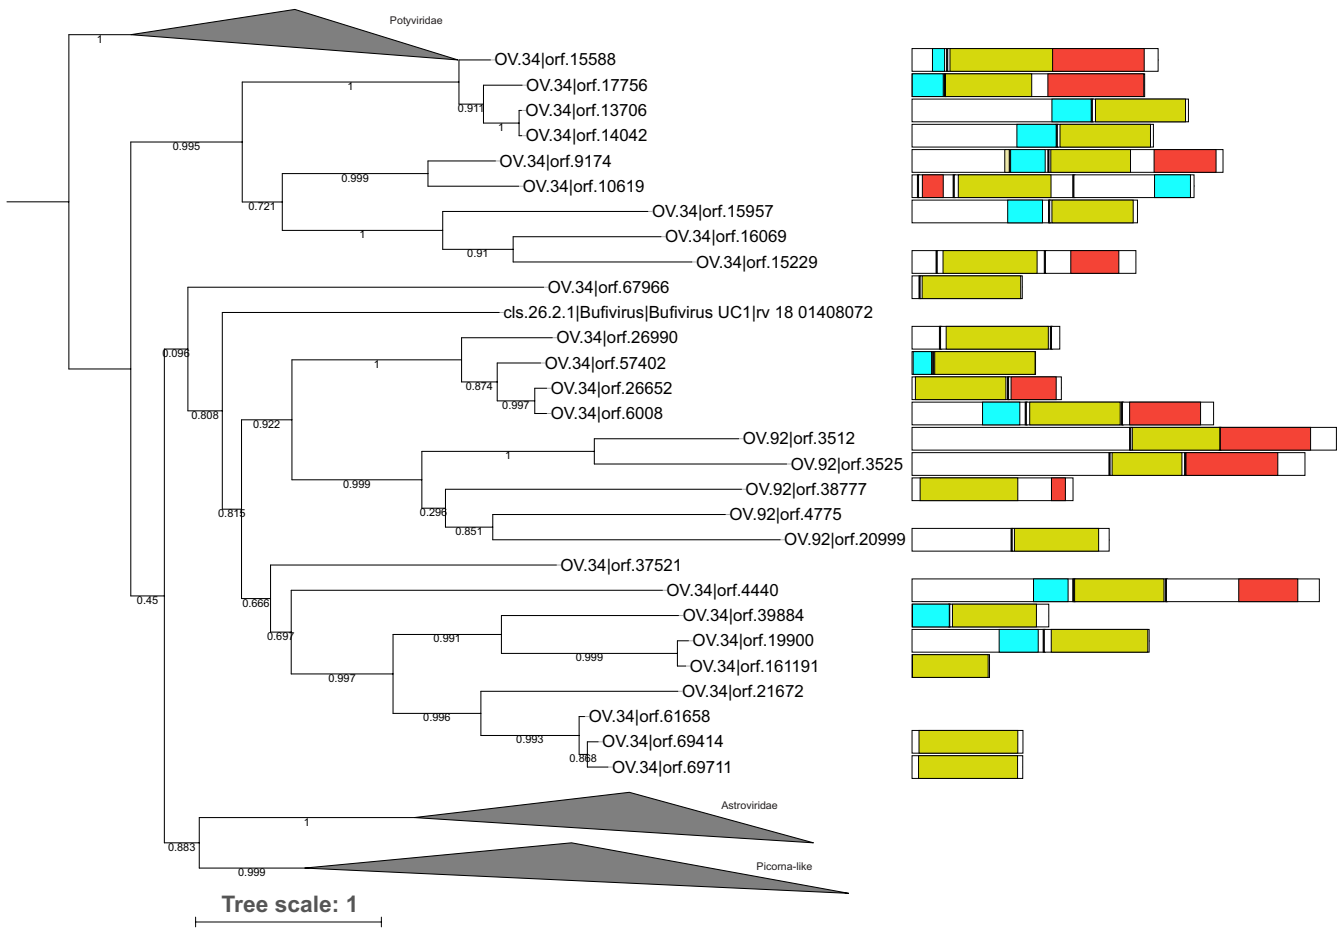

| Dataset legend |                                                               |
|----------------|---------------------------------------------------------------|
| Yellow         | RdRp                                                          |
| Red            | Capsid protein_jelly-roll                                     |
| Cyan           | Chymotrypsin-like protease                                    |
| Green          | Capping_methyltransferase_guanylyltransferase                 |
| Orange         | Superfamily 3 helicase                                        |
| Purple         | r84.0                                                         |
| Blue           | Tombusvirus p33_Luteo_P1 domain_auxiliary replication protein |
| Brown          | Superfamily 1 helicase                                        |
| Pink           | Major capsid protein_Tob-like (T=1)                           |
| Light Green    | Putative protease co-factor_calici-corn32K-like               |
| Dark Grey      | Maturation_Levi                                               |
| Dark Green     | Phospholipase A2                                              |
| Light Blue     | VP4_Dicistro                                                  |
| Light Yellow   | Capsid protein_Levi-like                                      |
| Pink           | PrnW-protease                                                 |
| Light Green    | small_ubiquitin-related_modifier_SUMO                         |
| Light Yellow   | Zinc-binding domain                                           |
| Dark Grey      | Others                                                        |

# Ov38

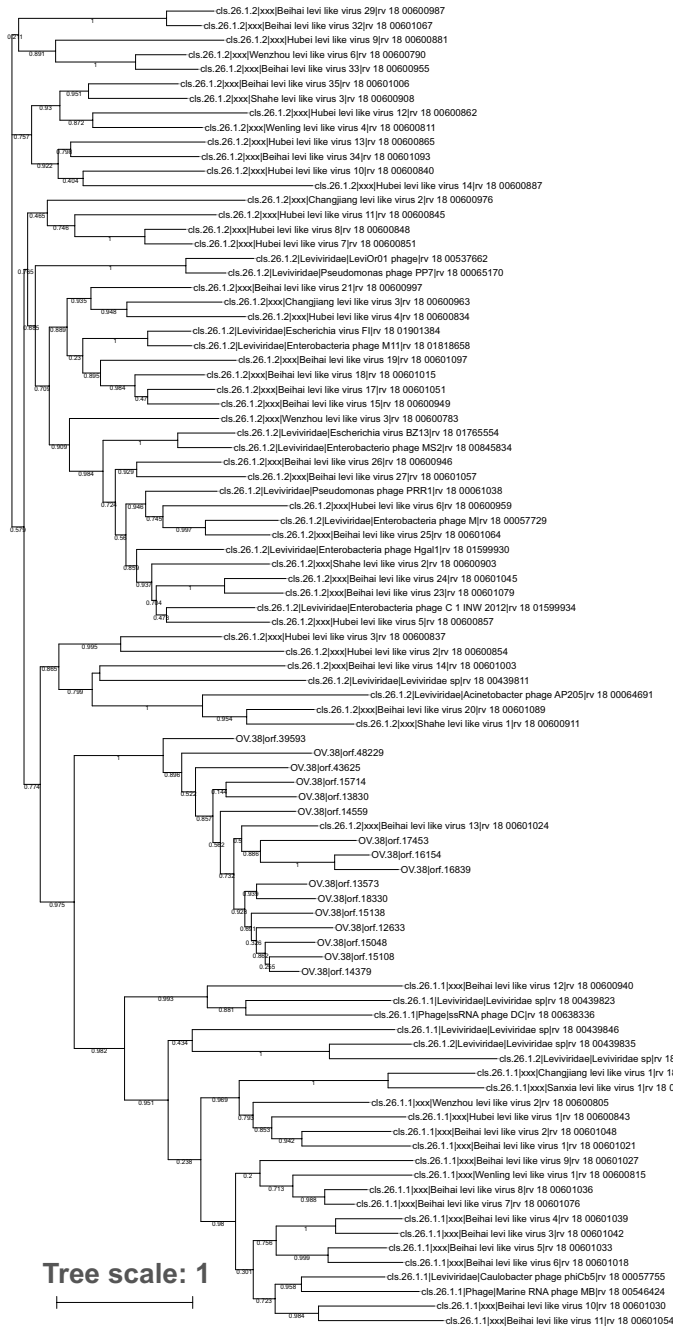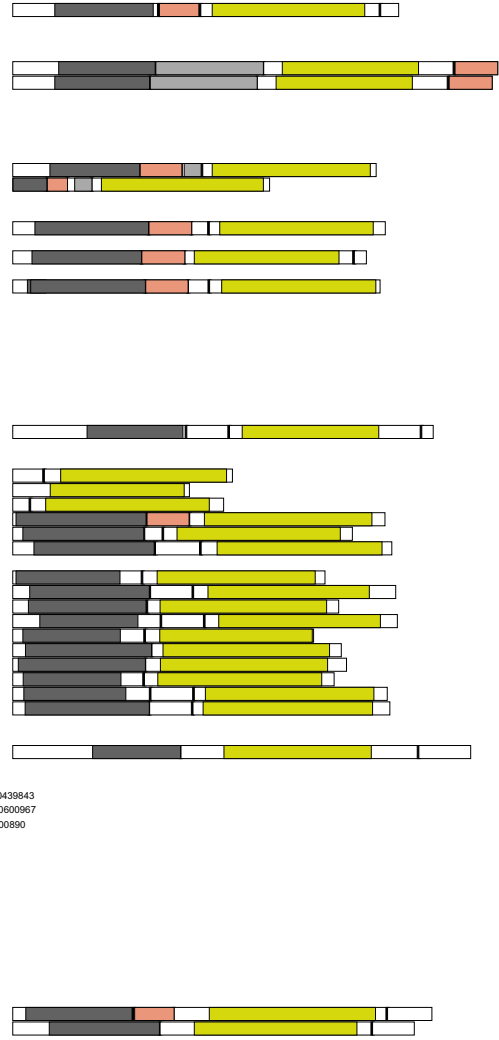

## Dataset legend

- RdRp
- Maturation\_Levi
- Capsid protein\_Levi-like

# Ov50

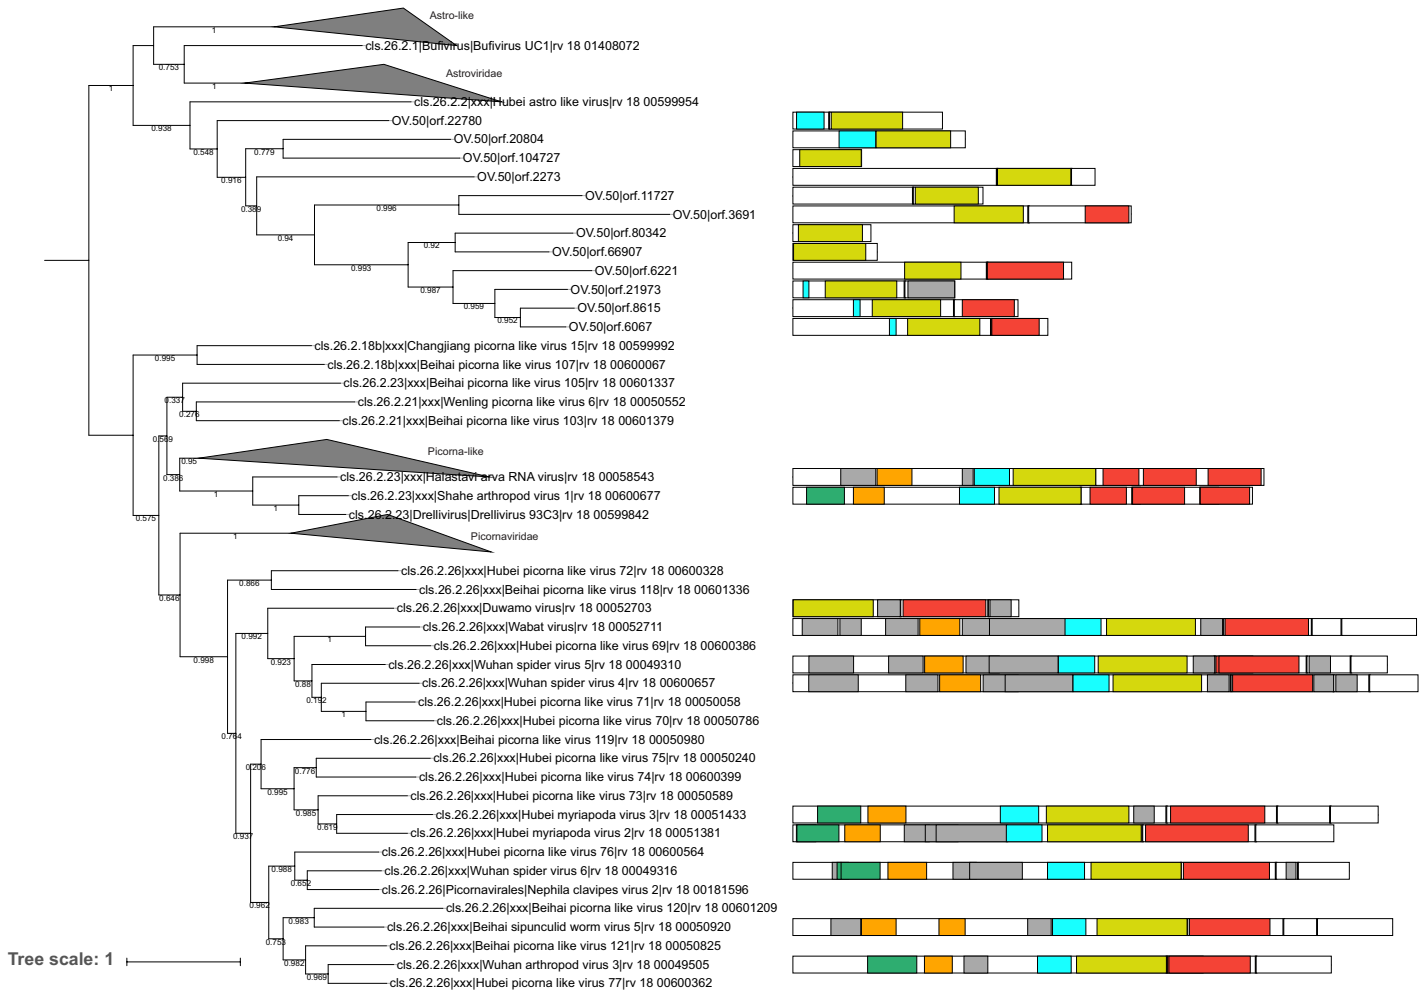

## Dataset legend

- RdRp
- Capsid protein\_Jelly-roll
- Chymotrypsin-like protease
- Capping\_methyltransferase\_guanylyltransferase
- Superfamily 3 helicase
- r84.0
- Tombusvirus p33\_Luteo\_P1 domain\_auxiliary replication protein
- Superfamily 1 helicase
- Major capsid protein\_Toti-like (T=1)
- Putative protease co-factor\_calici-como32K-like
- Maturation\_Levi
- Phospholipase A2
- VP4\_Dicistro
- Capsid protein\_Levi-like
- PrsW-protease
- small\_ubiquitin-related\_modifier\_SUMO
- Zinc-binding domain
- Others

# Ov56

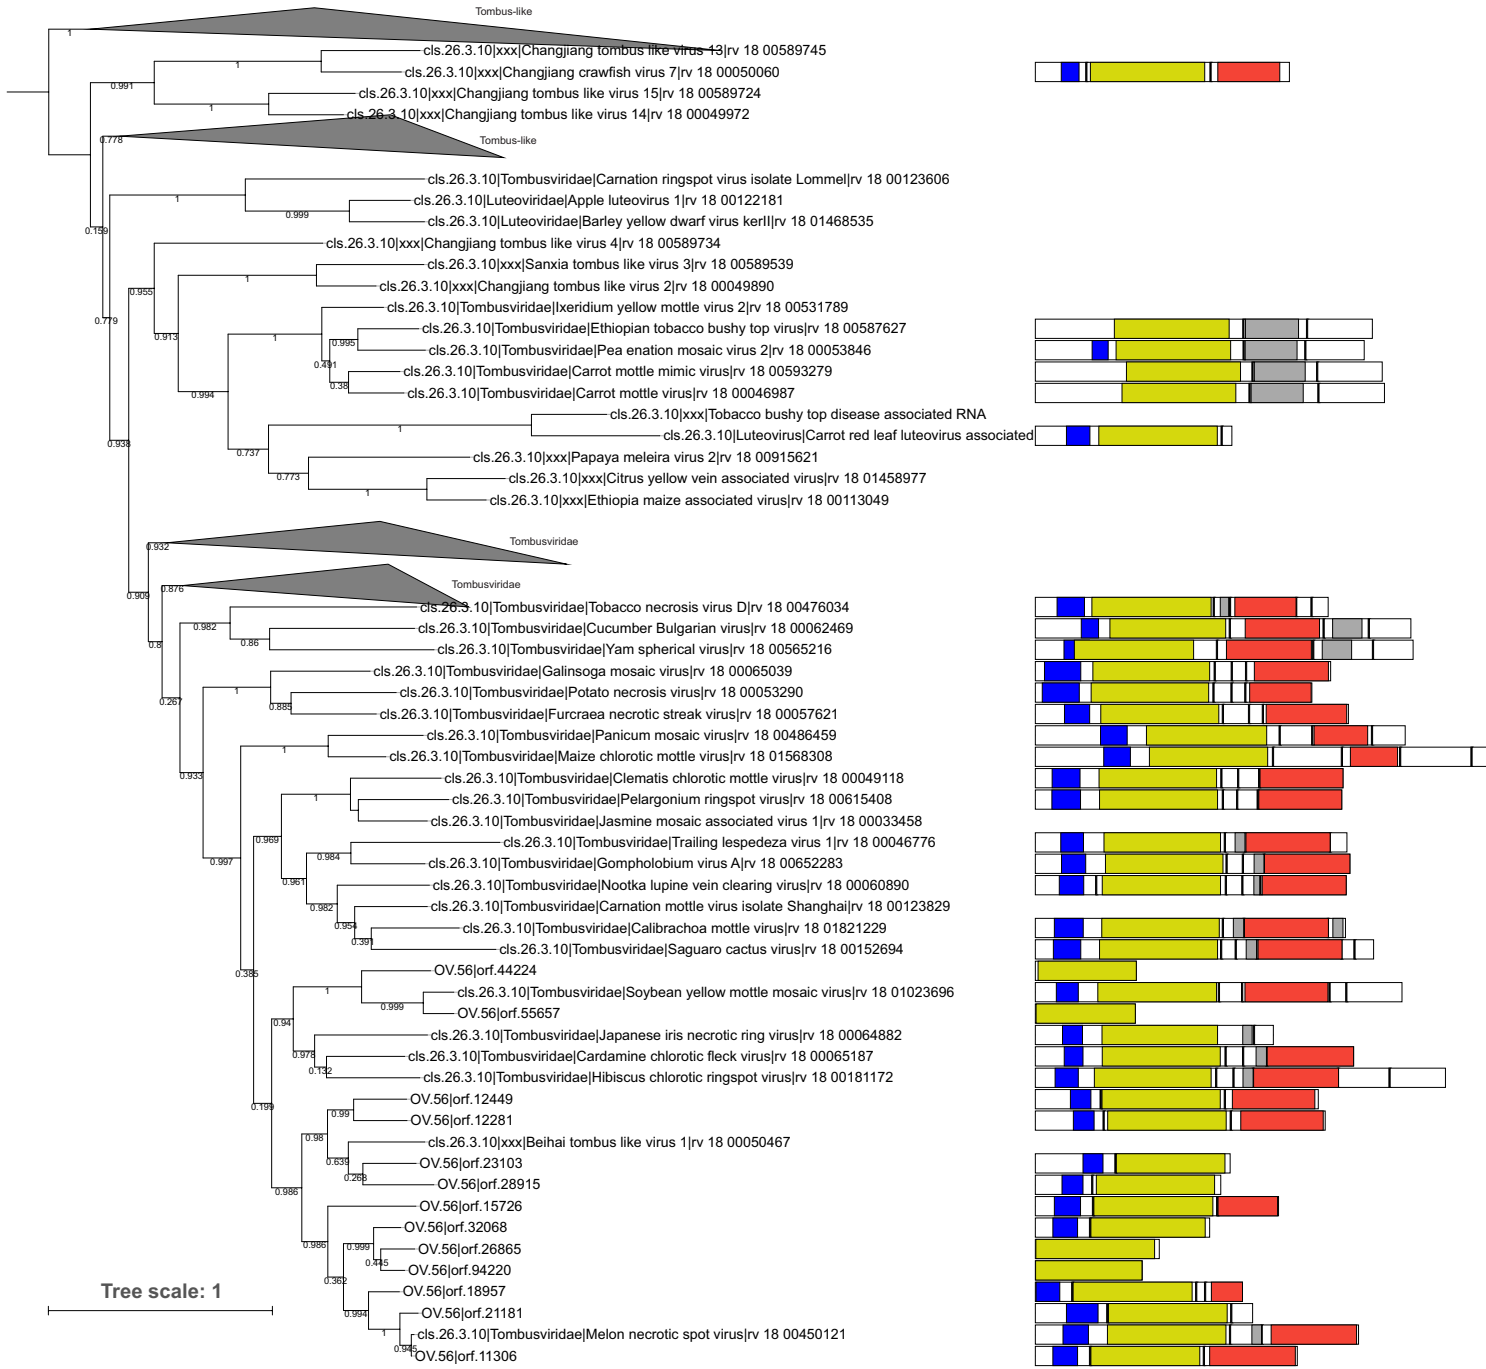

## Dataset legend

- RdRp
- Capsid protein\_Jelly-roll
- Chymotrypsin-like protease
- Capping\_methyltransferase\_guanlyltransferase
- Superfamily 3 helicase
- r84.0
- Tombusvirus p33\_Luteo\_P1 domain\_auxiliary replication protein
- Superfamily 1 helicase
- Major capsid protein\_Toti-like (T=1)
- Putative protease co-factor\_calici-como32K-like
- Maturation\_Levi
- Phospholipase A2
- VP4\_Dicistro
- Capsid protein\_Levi-like
- PrsW-protease
- small\_ubiquitin-related\_modifier\_SUMO
- Zinc-binding domain
- Others

# Ov57

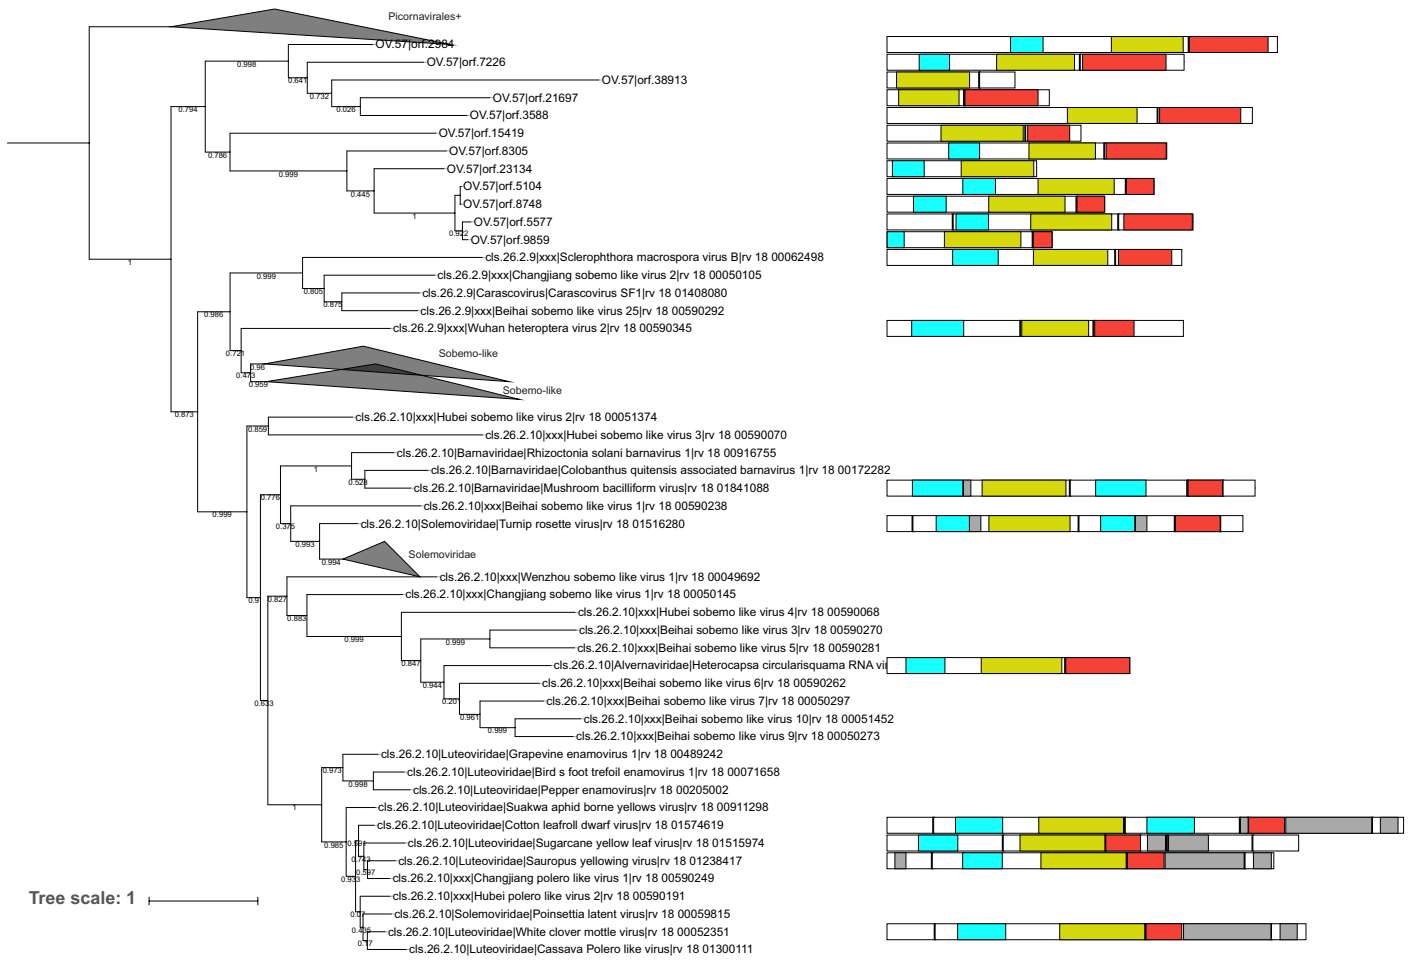

## Dataset legend

- RdRp
- Capsid protein\_Jelly-roll
- Chymotrypsin-like protease
- Capping\_methyltransferase\_guanylyltransferase
- Superfamily 3 helicase
- r84.0
- Tombusvirus p33\_Luteo\_P1 domain\_auxiliary replication protein
- Superfamily 1 helicase
- Major capsid protein\_Toti-like (T=1)
- Putative protease co-factor\_calici-como32K-like
- Maturation\_Levi
- Phospholipase A2
- VP4\_Dicistro
- Capsid protein\_Levi-like
- PrsW-protease
- small\_ubiquitin-related\_modifier\_SUMO
- Zinc-binding domain
- Others

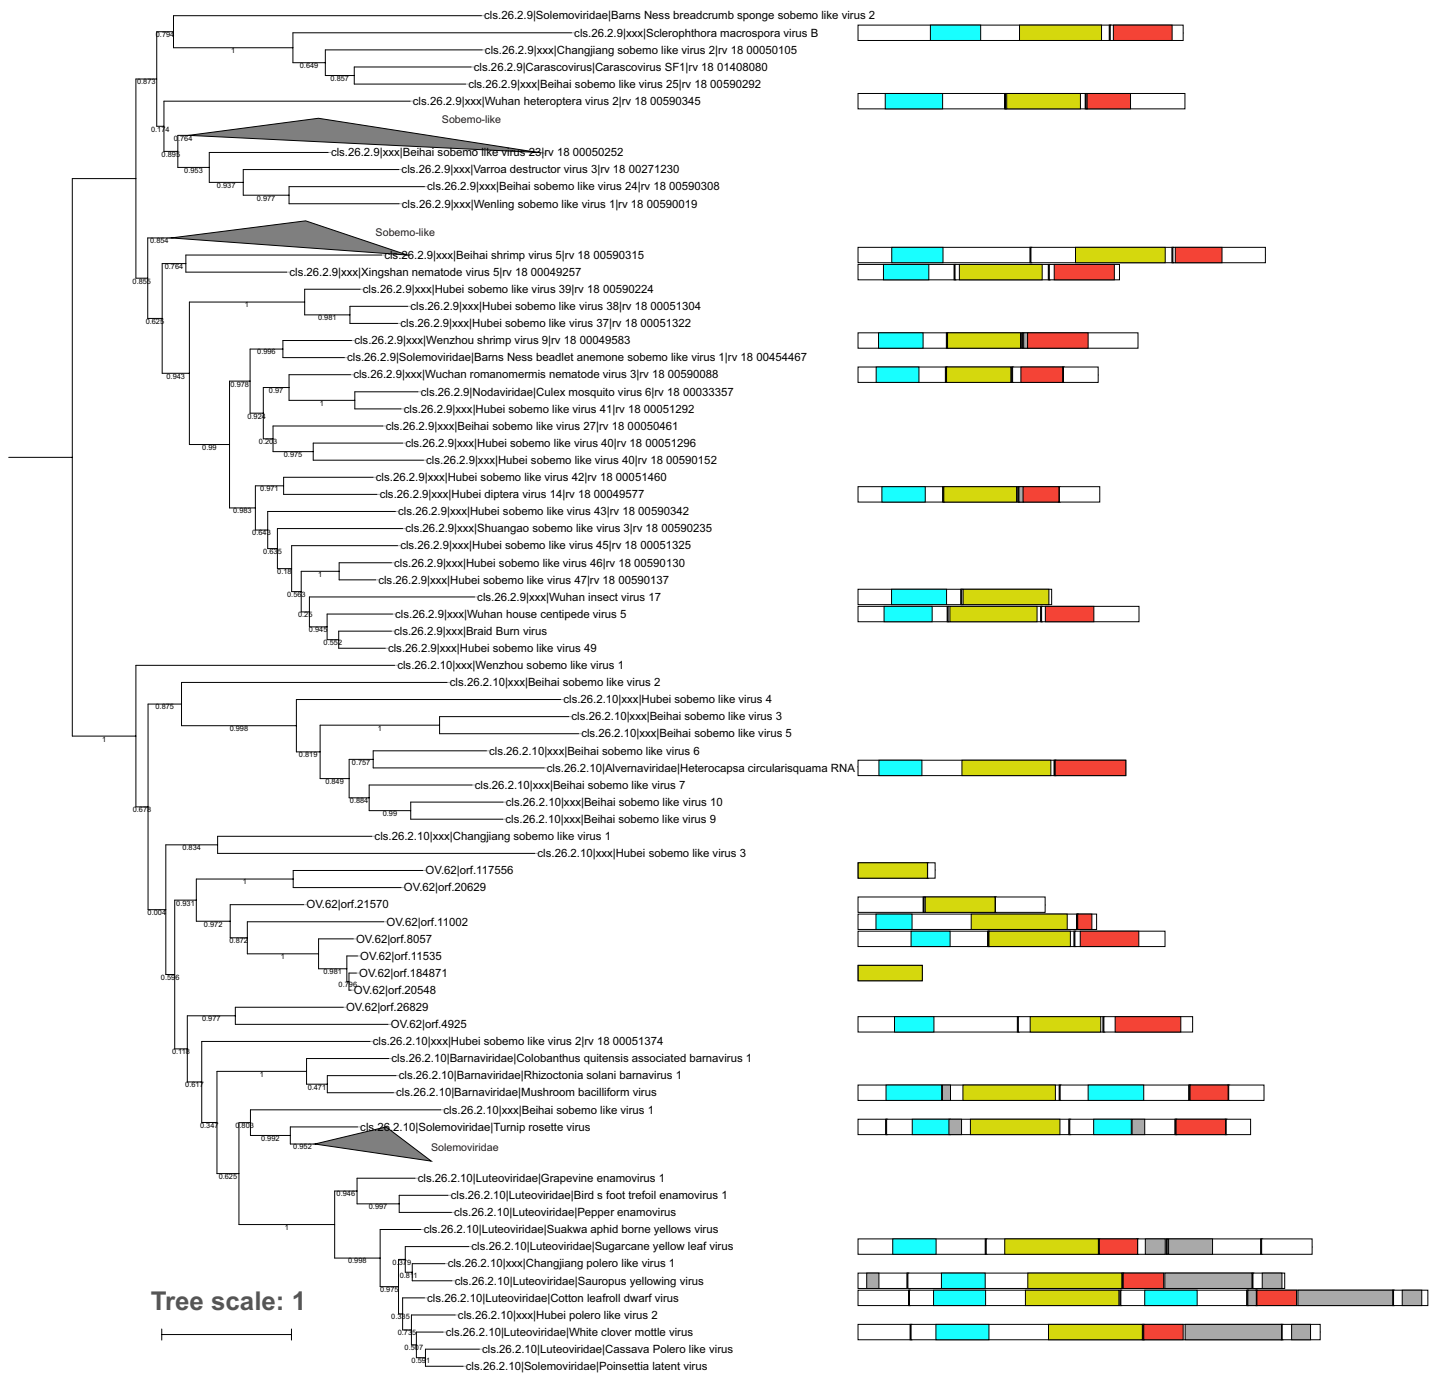

#### Dataset legend

- RdRp
- Capsid protein\_Jelly-roll
- Chymotrypsin-like protease
- Capping\_methyltransferase\_guanylyltransferase
- Superfamily 3 helicase
- r84.0
- Tombusvirus p33\_Luteo\_P1 domain\_auxiliary replication protein
- Superfamily 1 helicase
- Major capsid protein\_Toti-like (T=1)
- Putative protease co-factor\_calici-como32K-like
- Maturation\_Levi
- Phospholipase A2
- VP4\_Dicistro
- Capsid protein\_Levi-like
- PrsW-protease
- small\_ubiquitin-related\_modifier\_SUMO
- Zinc-binding domain
- Others

# Ov67

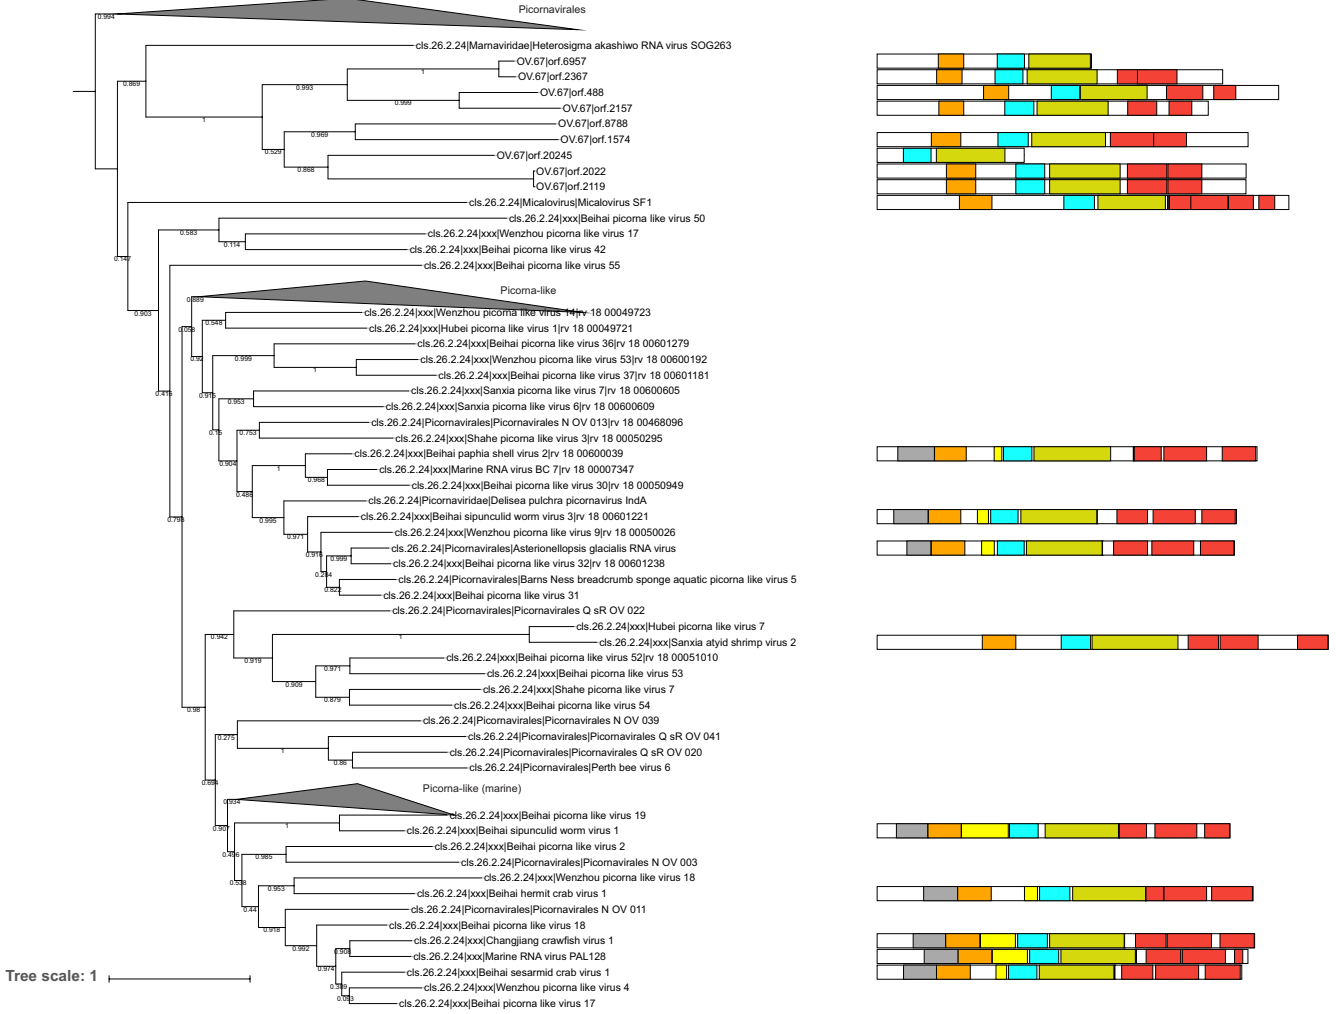

## Dataset legend

- RdRp
- Capsid protein\_Jelly-roll
- Chymotrypsin-like protease
- Capping\_methyltransferase\_guanylyltransferase
- Superfamily 3 helicase
- r84.0
- Tombusvirus p33\_Luteo\_P1 domain\_auxiliary replication protein
- Superfamily 1 helicase
- Major capsid protein\_Toti-like (T=1)
- Putative protease co-factor\_calici-como32K-like
- Maturation\_Levi
- Phospholipase A2
- VP4\_Dicistro
- Capsid protein\_Levi-like
- PrsW-protease
- small\_ubiquitin-related\_modifier\_SUMO
- Zinc-binding domain
- Others

# Ov73

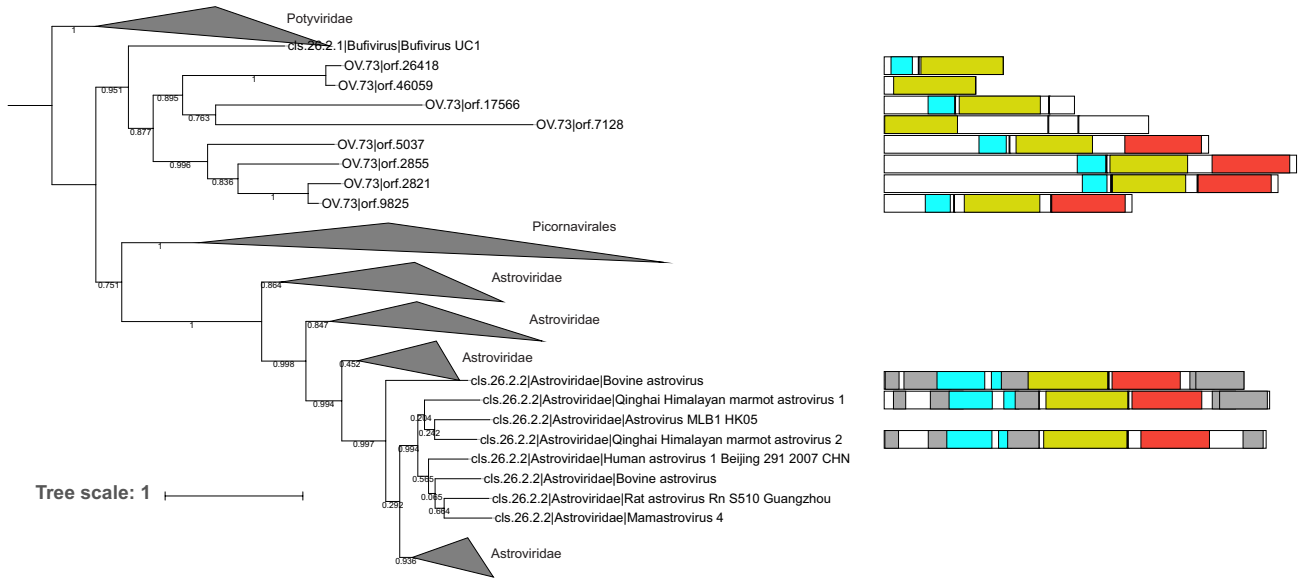

## Dataset legend

- RdRp
- Capsid protein\_Jelly-roll
- Chymotrypsin-like protease
- Capping\_methyltransferase\_guanylyltransferase
- Superfamily 3 helicase
- r84.0
- Tombusvirus p33\_Luteo\_P1 domain\_auxiliary replication protein
- Superfamily 1 helicase
- Major capsid protein\_Toti-like (T=1)
- Putative protease co-factor\_calici-corno32K-like
- Maturation\_Levi
- Phospholipase A2
- VP4\_Dicistro
- Capsid protein\_Levi-like
- PrsW-protease
- small\_ubiquitin-related\_modifier\_SUMO
- Zinc-binding domain
- Others



# Ov76

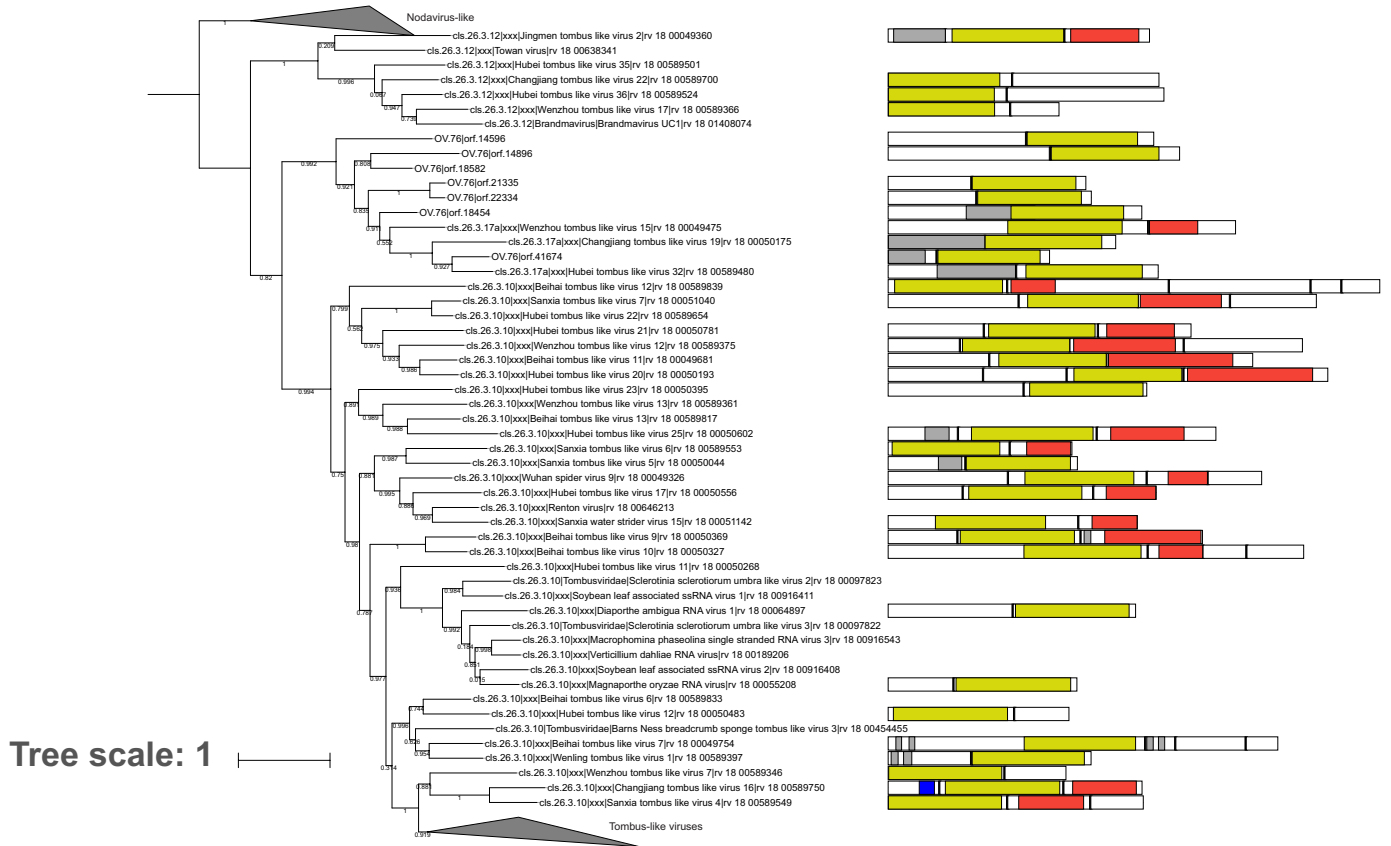

**Dataset legend**

- RdRp
- Capsid protein\_Jelly-roll
- Chymotrypsin-like protease
- Capping\_methyltransferase\_guanylyltransferase
- Superfamily 3 helicase
- rB4.0
- Tombusvirus p33\_Luteo\_P1 domain\_auxiliary replication protein
- Superfamily 1 helicase
- Major capsid protein\_Toti-like (T=1)
- Putative protease co-factor\_calici-como32K-like
- Maturation\_Levi
- Phospholipase A2
- VP4\_Dicistro
- Capsid protein\_Levi-like
- PrsW-protease
- small\_ubiquitin-related\_modifier\_SUMO
- Zinc-binding domain
- Others

# Ov81

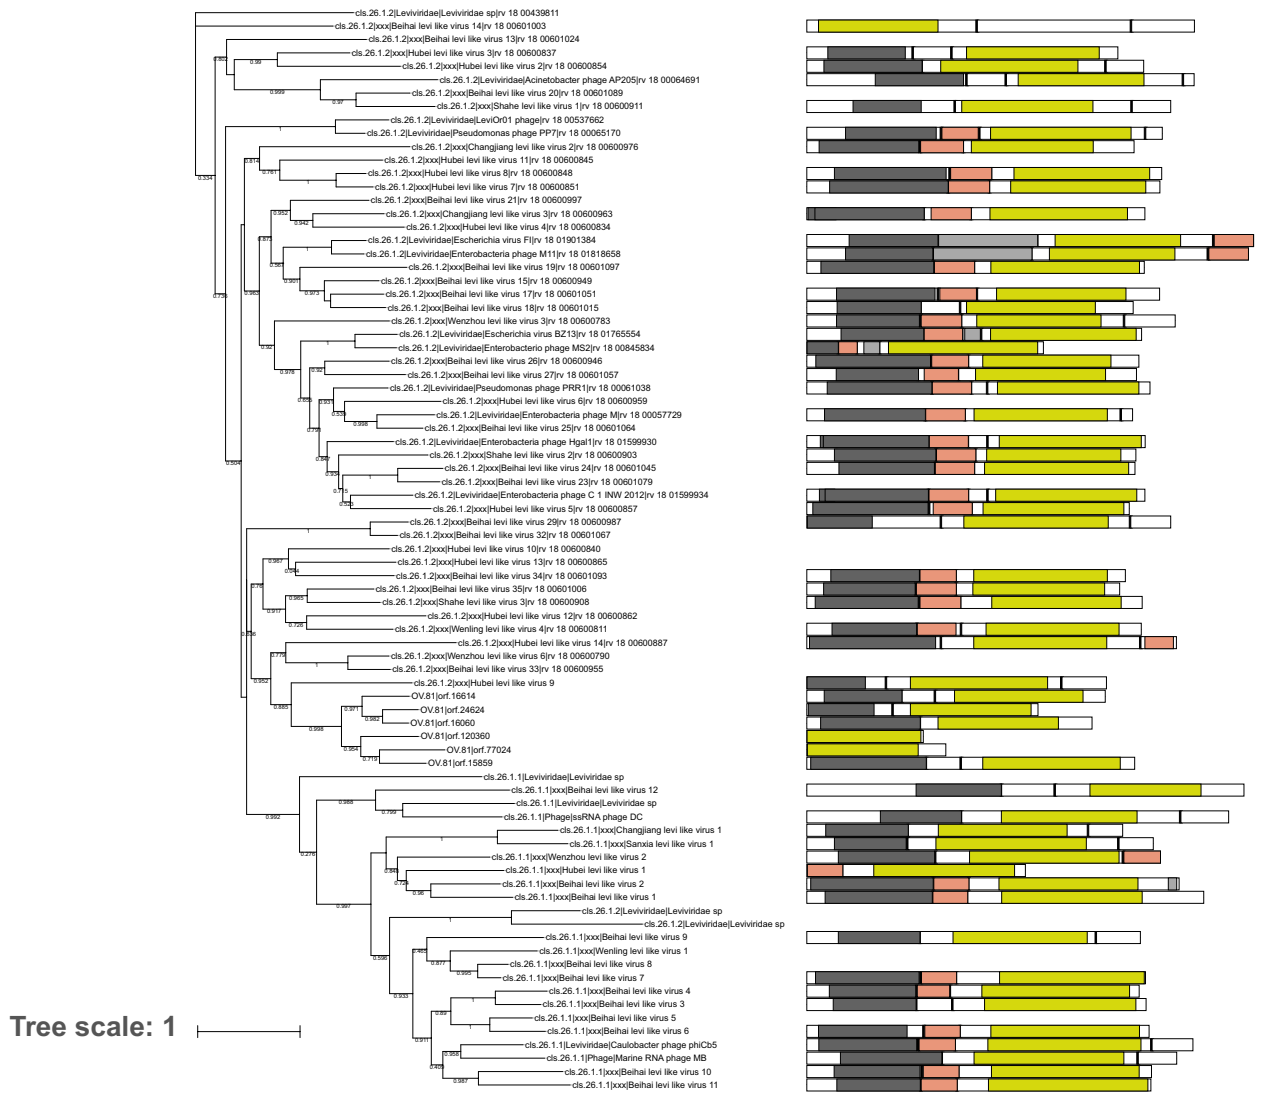

### Dataset legend

- RdRp
- Capsid protein\_Jelly-roll
- Chymotrypsin-like protease
- Capping\_methyltransferase\_guanylyltransferase
- Superfamily 3 helicase
- r84.0
- Tombusvirus p33\_Luteo\_P1 domain\_auxiliary replication protein
- Superfamily 1 helicase
- Major capsid protein\_Toti-like (T=1)
- Putative protease co-factor\_calici-como32K-like
- Maturation\_Levi
- Phospholipase A2
- VP4\_Dicistro
- Capsid protein\_Levi-like
- PrsW-protease
- small\_ubiquitin-related\_modifier\_SUMO
- Zinc-binding domain
- Others

# Ov85

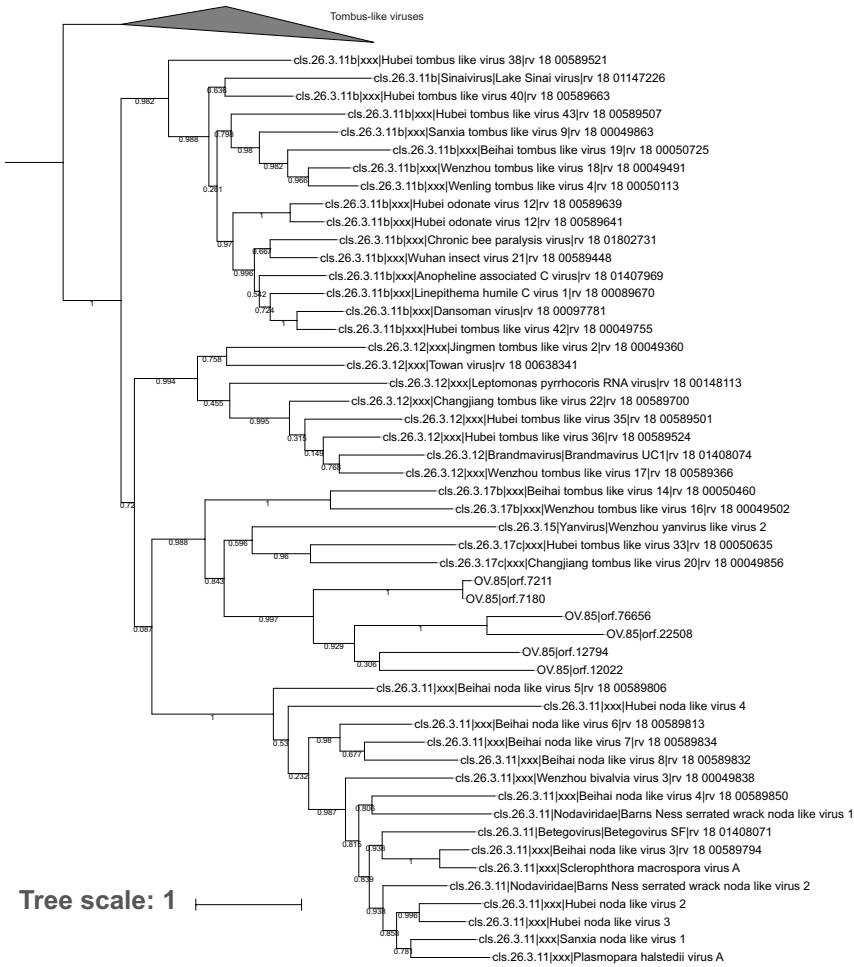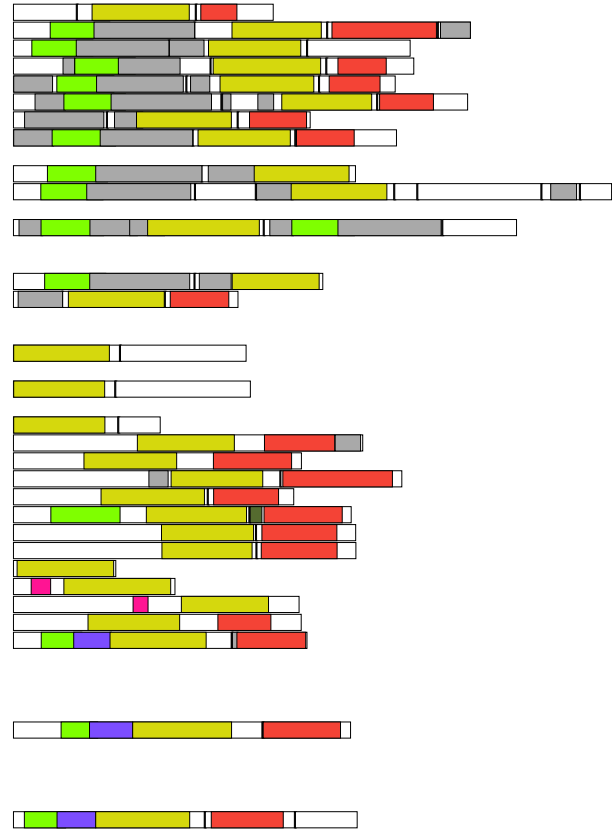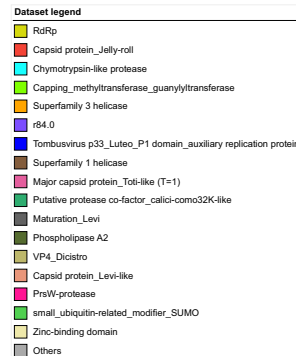

# Ov89

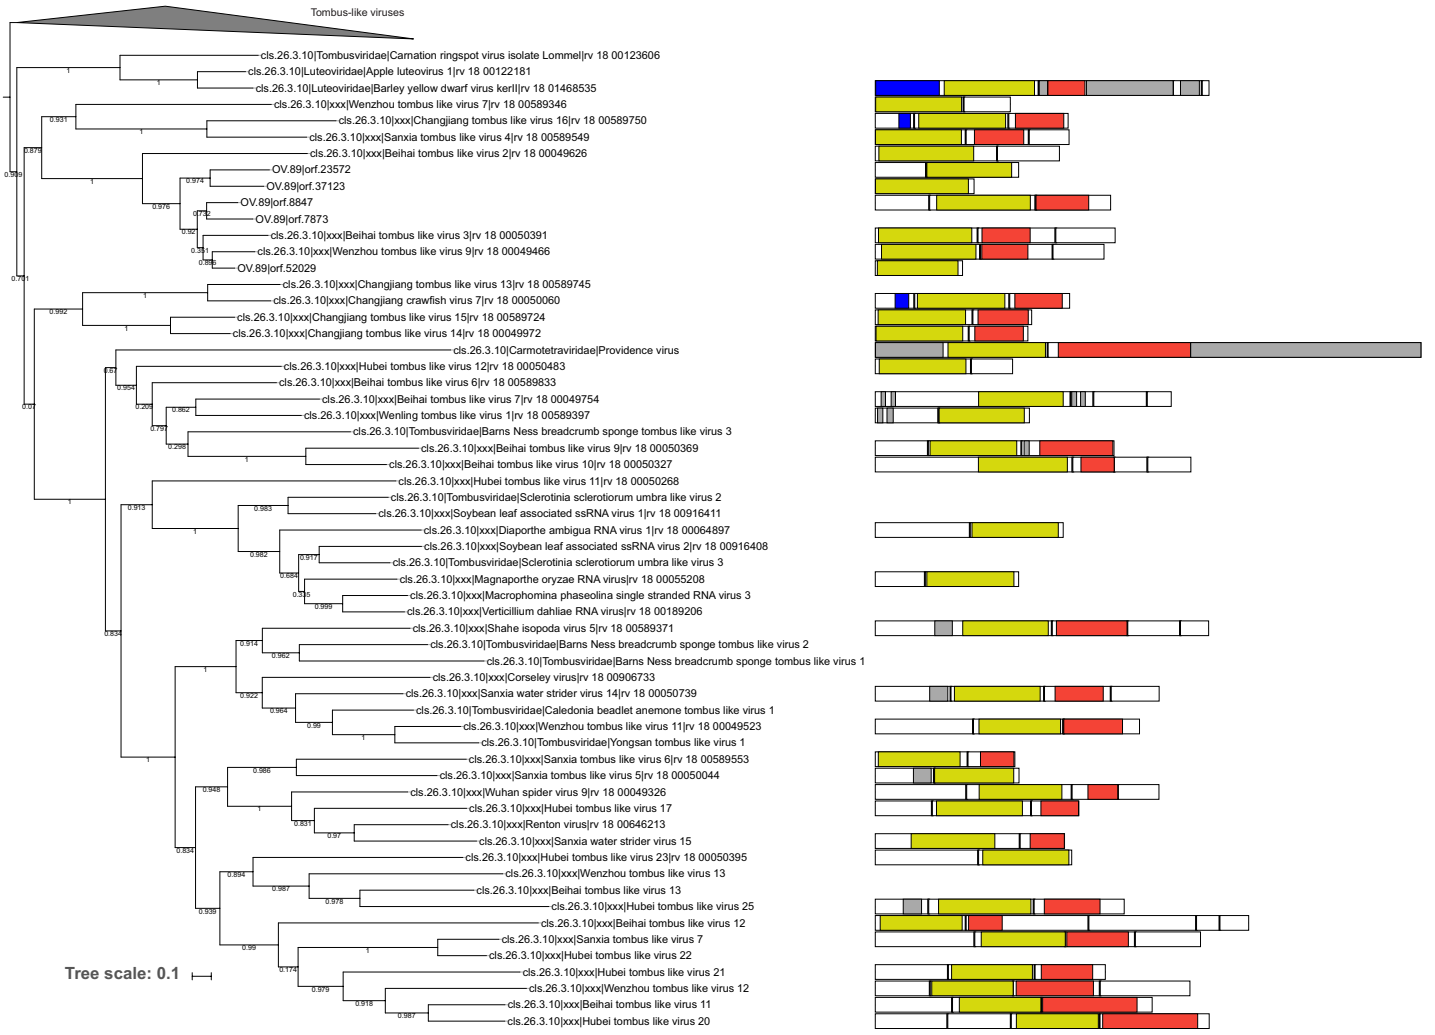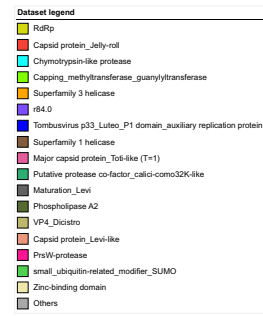

# Ov123

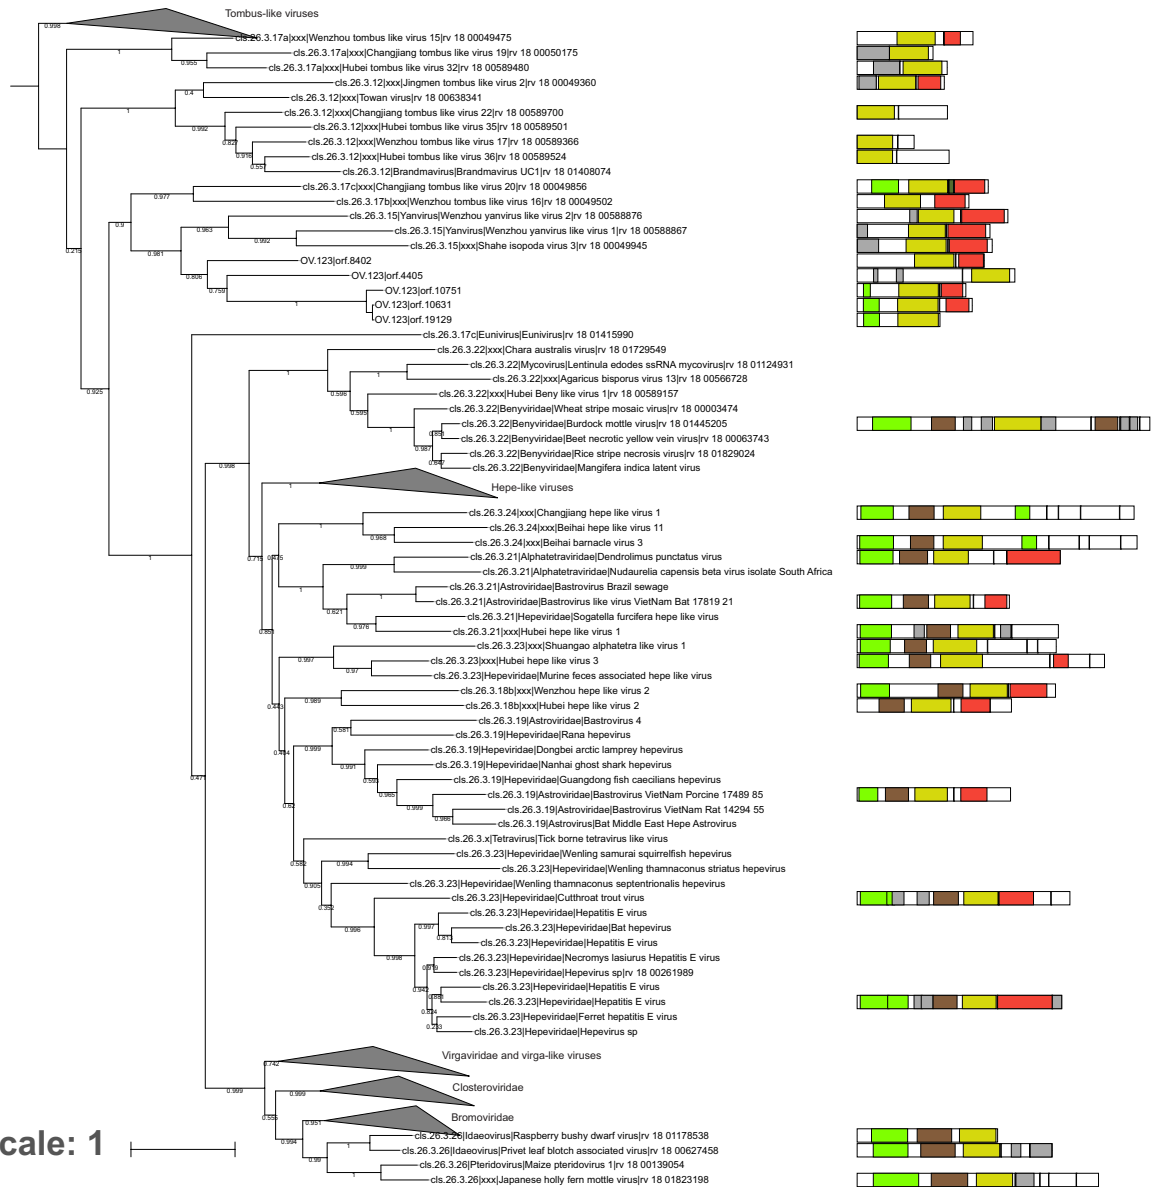

## Dataset legend

- RdRp
- Capsid protein\_Jelly-roll
- Chymotrypsin-like protease
- Capping\_methyltransferase\_guanylyltransferase
- Superfamily 3 helicase
- r84.0
- Tombusvirus p33\_Luteo\_P1 domain\_auxiliary replication protein
- Superfamily 1 helicase
- Major capsid protein\_Toti-like (T=1)
- Putative protease co-factor\_calici-como32K-like
- Maturation\_Levi
- Phospholipase A2
- VP4\_Dicistro
- Capsid protein\_Levi-like
- PrsW-protease
- small\_ubiquitin-related\_modifier\_SUMO
- Zinc-binding domain
- Others

# Ov161

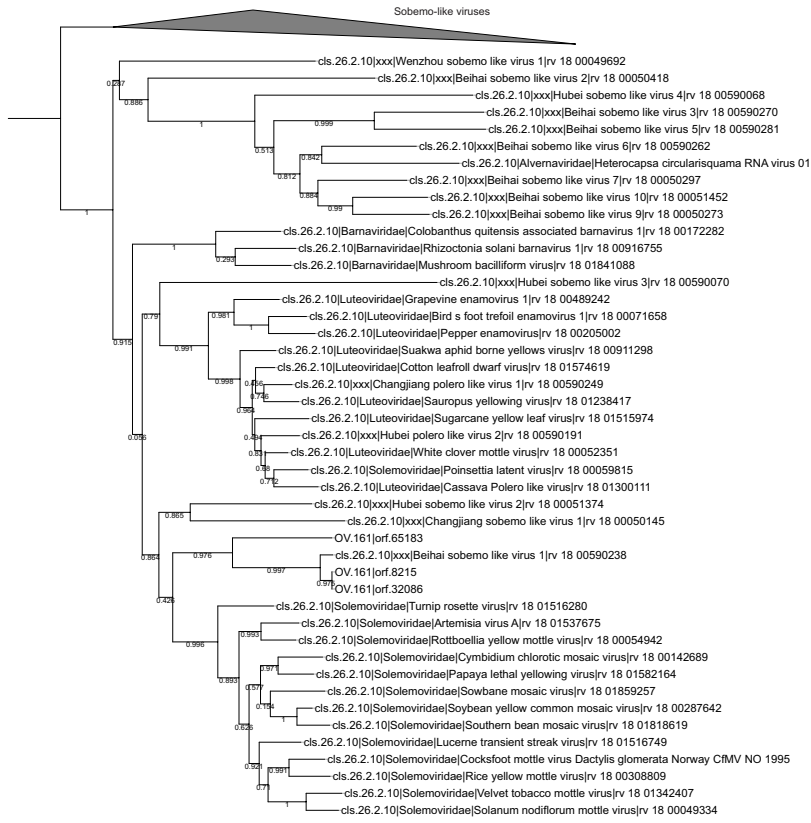

Tree scale: 1

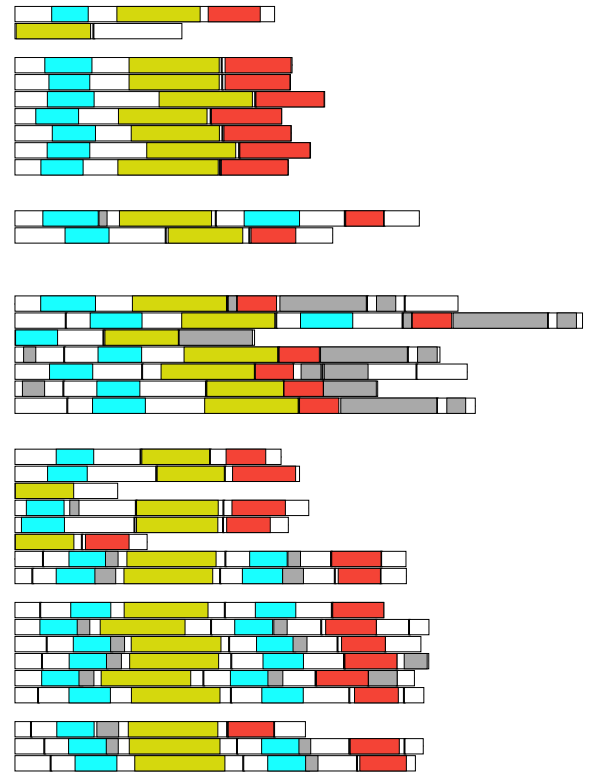

## Dataset legend

- RdRp
- Capsid protein\_Ljelly-roll
- Chymotrypsin-like protease
- Capping\_methyltransferase\_guanylyltransferase
- Superfamily 3 helicase
- r64.0
- Tombusvirus p33\_Luteo\_P1 domain\_auxiliary replication protein
- Superfamily 1 helicase
- Major capsid protein\_TotI-like (T=1)
- Putative protease co-factor\_calici-como32K-like
- Maturation\_Levi
- Phospholipase A2
- VP4\_Dicistro
- Capsid protein\_Levi-like
- PrsW-protease
- small\_ubiquitin-related\_modifier\_SUMO
- Zinc-binding domain
- Others

# Ov201

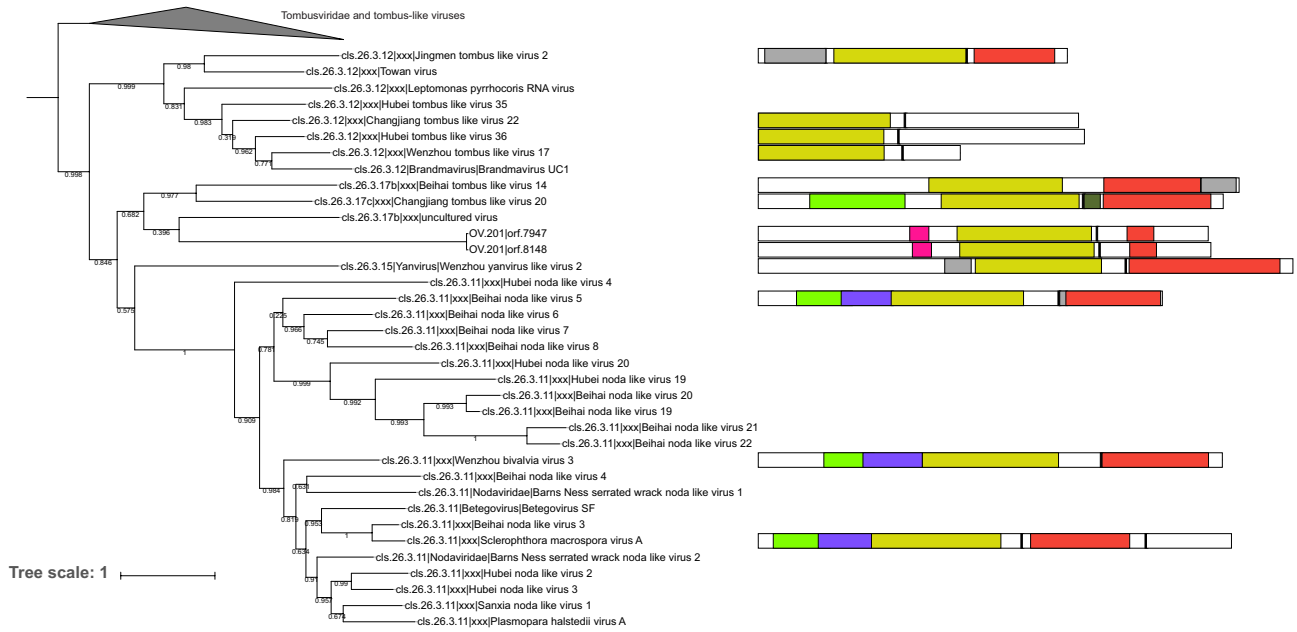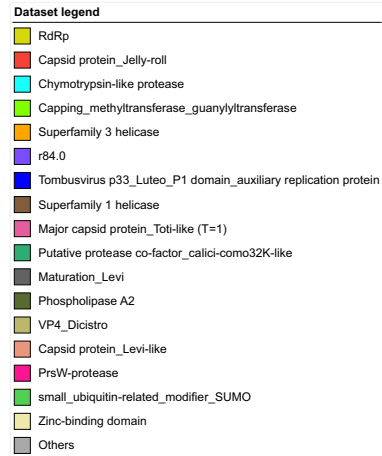

Supplement: 41564_2020_755_MOESM3_ESM.pdf [file 41564_2020_755_MOESM3_ESM.pdf]
